1  
2  
3  
4  
5  
6  
7  
8  
9  
10  
11  
12  
13  
14  
15  
16  
17  
18  
19  
20  
21  
22  
23

**Single-cell transcriptomics, scRNA-Seq and C1 CAGE discovered distinct phases of pluripotency during naïve-to-primed conversion in mice**

**Authors**

Michael Böttcher<sup>1\*</sup>, Yuhki Tada<sup>2\*</sup>, Jonathan Moody<sup>1</sup>, Masayo Kondo<sup>2</sup>, Hiroki Ura<sup>2</sup>, Imad Abugessaisa<sup>1</sup>, Takeya Kasukawa<sup>1</sup>, Chung-Chau Hon<sup>1</sup>, Koji Nagao<sup>3</sup>, Piero Carninci<sup>1†</sup>, Kuniya Abe<sup>2,4†</sup>

**Affiliations**

1 RIKEN Center for Integrative Medical Sciences (IMS), 1-7-22 Suehiro-cho, Tsurumi-ku, Yokohama, Kanagawa, 230-0045 Japan

2 RIKEN BioResource Research Center, 3-1-1 Koyadai, Tsukuba, Ibaraki, 305-0074 Japan

3 Department of Biological Sciences, Graduate School of Science, Osaka University, 1-1 Machikaneyama-cho, Toyonaka, Osaka 560-0043 Japan

4 Animal Developmental Genetics, Graduate School of Life and Environmental Sciences, University of Tsukuba, 1-1-1, Tennodai, Tsukuba, Ibaraki, 305-8577 Japan

†Correspondence: [carninci@riken.jp](mailto:carninci@riken.jp), [kuniya.abe@riken.jp](mailto:kuniya.abe@riken.jp)

\*Equal contribution

## 24 **Abstract**

25

26 **Background:** Two types of mammalian pluripotent stem cells (PSC), i.e. naïve and  
27 primed possess distinct cellular characteristics. It is largely unknown how these  
28 differences are generated during naïve-to-primed transition process. We have  
29 established a robust *in vitro* transition system using a Wnt inhibitor for the first time  
30 and analyzed dynamic changes in cellular status via single-cell RNA-sequencing and  
31 C1 CAGE analyses.

32 **Results:** Analysis of known marker genes suggested that the cell transition process  
33 progresses as expected. However, cluster analyses revealed a sudden increase in  
34 expression profile diversities three and four days after induction of the transition. These  
35 expression diversities can be reconciled by the presence of two subpopulations with  
36 distinct transcription profiles emerging at these time points. One of the subpopulations  
37 appears transiently, and surprisingly these cells showed a global downregulation of  
38 gene expression. Moreover, initiation of random X chromosome inactivation (XCI)  
39 coincides with the appearance of these transient cells. The other subpopulation can  
40 be maintained as a stem cell line and possesses expression profiles more similar to  
41 those of primed epiblast stem cells (EpiSC) than embryonic stem cells (ESC).  
42 However, there are important differences in gene expression related to epithelial-  
43 mesenchymal transition (EMT), suggesting that this subpopulation may represent a  
44 novel pluripotent state that has an intermediate cellular phenotype between ESC and  
45 EpiSC.

46 **Conclusions:** These findings should contribute to our understanding of the  
47 establishment and maintenance of distinct differentiation statuses of mammalian PSCs  
48 and provide new insights into the pluripotency spectrum in general.

49

50 243 words (Max 250 words)

51

## 52 **Keywords**

53 Single cell transcriptomics, Pluripotent stem cells, Cell differentiation, Naïve  
54 pluripotency, Primed pluripotency, Developmental transition, enhancer RNA, non-  
55 coding RNA, X chromosome inactivation

56

## 57 Introduction

58

59 Pluripotency of cells becomes restricted during development. Cells are undergoing  
60 differentiation and acquire distinct functions required for each cell type and cell lineage.  
61 In mammals, there exists cell lineage maintaining pluripotency in the early stage of  
62 development, and cultured stem cell lines which can be propagated indefinitely *in vitro*  
63 while retaining pluripotency have been derived from these pluripotent cells. Currently,  
64 at least two types of PSCs are known in mammals, i.e. naïve and primed. Mouse ESCs  
65 correspond to naïve PSCs, while mouse EpiSCs, human ESCs and human induced  
66 pluripotent stem cells (iPSCs) are classified as primed PSCs. The mouse ESCs are  
67 derived from preimplantation blastocysts, while EpiSCs are derivative of epiblast cells  
68 of mouse postimplantation embryos. Naïve and primed PSCs, both have capacities to  
69 differentiate into multiple cell types from the three germ layers, although they are  
70 different in various aspects. For example, there are differences between mouse ESCs  
71 and EpiSCs in their epigenetic status, e.g. DNA methylation [1], enhancer usage [2,  
72 3], expression of naïve pluripotent markers [4], cell adhesion properties [5], nuclear  
73 architecture/replication timing [6], and metabolism [7]. Furthermore, in female cells X  
74 chromosome inactivation (XCI) takes place in EpiSCs, whereas mESCs show no XCI  
75 [8]. These differences were revealed by comparisons between mouse ESCs and  
76 EpiSCs, but it is still largely unknown how these differences are generated during the  
77 transition process from naïve to primed status or how cells exit from the naïve state to  
78 gain primed pluripotency. On the other hand, it has been suggested that mammalian  
79 PSCs may have greater diversities than previously thought [9; 10]. For example, it was  
80 reported that EpiSC-like cells may be present in the mES cell population or vice versa  
81 [11, 12]. Recently, "formative state", a hypothetical state representing the intermediate  
82 state between naïve and primed states has been proposed [13, 14]. However, such  
83 an intermediate state between naïve and primed has previously not been clearly  
84 defined. This is probably due to the lack of an experimental model system that  
85 recapitulates the naïve-to-primed transition reproducibly *in vitro*. Mouse ESCs can be  
86 converted to primed PSCs by changing the culture medium, but massive cell death  
87 occurs, which hampers a precise analysis of the transition process [15, 16]. Epiblast-  
88 like cells (EpiLC) possess cellular characteristics similar to the primed EpiSCs, but

89 these cells appear only transiently after induction from mESCs and cannot be  
90 maintained as a stem cell line [17]. We recently reported a robust method to efficiently  
91 establish EpiSC cell lines by using a Wnt inhibitor [18]. Using a modified culture  
92 condition with the Wnt inhibitor we succeeded to establish an *in vitro* system, in which  
93 we could efficiently and reproducibly convert ESC to primed PSC-like cells for the first  
94 time. The primed PSC-like cells generated in this way show cellular morphologies  
95 highly similar to those of the existing EpiSC lines and can be maintained *in vitro* for at  
96 least 20 passages (this work) without losing the primed PSC characteristics. As a  
97 preliminary experiment, we have converted mES cells carrying a fluorescence reporter  
98 specific to the naïve state and found that the transition process proceeds  
99 asynchronously, and that cells with distinct cellular states were intermingled within a  
100 colony. Therefore, we applied two methods of single-cell RNA sequencing; as the  
101 Fluidigm single-cell RNA-Seq (scRNA-Seq) [19] and single-cell C1 Cap Analysis of  
102 Gene Expression (C1 CAGE) [20] to elucidate dynamic changes in cellular status  
103 during the naïve-to-primed transition process at single-cell resolution for the first time.  
104 CAGE detects 5'-end of coding mRNA as well as non-coding RNA including enhancer  
105 or antisense RNAs [21]. Thus, this technique may provide insights into the  
106 enhancer/promoter interplay or non-coding RNA functions, which drives hierarchical  
107 regulations of gene expression during development.

108 Single-cell transcriptome data revealed distinct cell clusters in addition to the  
109 clusters mainly composed of ESCs or EpiSCs. The temporal order of emergence of  
110 these intermediary clusters was estimated by pseudotime analysis. Surprisingly,  
111 thousands of genes are globally downregulated in one of the intermediary clusters.  
112 Moreover, initiation of XCI coincides with the appearance of this cell cluster. The other  
113 subpopulation represents self-renewing stem cells exhibiting distinct expression  
114 profiles from the EpiSC cells, suggesting that this subpopulation may represent novel  
115 stem cells that have an intermediate cellular phenotype between mESC and EpiSC.

116 These findings should contribute to our understanding of the establishment and  
117 maintenance of distinct differentiation statuses of mammalian PSCs and provide new  
118 insights into the pluripotency spectrum in general.

119  
120

## 121 **Materials and Methods**

122

### 123 **Cell line**

124 ESCs used in this study were established from female F1 inter-subspecific hybrid  
125 embryos (MB3), a cross between C57BL/6J (B6) and MSM/Ms (MSM) (RIKEN RBC  
126 No. RBRC00209). MSM is an inbred mouse strain derived from the Japanese wild  
127 mouse *Mus musculus molossinus*. We also used female EpiSCs, 129Ba2, a 129xB6N  
128 F1 hybrid line [18]. In addition, we sampled the primed PSC-like cells at Day 22 (P10)  
129 and a clonal cell line isolated from the primed PSC-like cells sampled at passage 20  
130 (Clone 1E). All animal experiments were approved by the Institution Animal  
131 Experiment Committee of RIKEN Tsukuba Institute.

132

### 133 **ES cell culture**

134 Mouse ESCs were cultured in ES medium composed of Glasgow-Minimal Essential  
135 Medium (GMEM) (Sigma-Aldrich) supplemented with 14% knockout serum  
136 replacement (KSR) (Life Technologies), 1% ES culture grade fetal calf serum (FCS)  
137 (Life Technologies), 1x non-essential amino acid (NEAA) (Life Technologies), 1000  
138 units/mL LIF, 100  $\mu$ M 2-mercaptoethanol and penicillin/streptomycin. Mouse ESCs  
139 were maintained on mitomycin C (Sigma-Aldrich) treated mouse embryonic fibroblast  
140 (MEF) feeder cells [22].

141

### 142 **Naïve-to-primed conversion**

143 Mouse ESCs were seeded onto MEF feeders at a density of  $1-3 \times 10^5$  cells per 3 cm  
144 dish and cultured in the ES medium over night at 37°C. For conversion of ES cells to  
145 EpiSC-like cells, ES cell medium was replaced with EpiSC medium (DMEM/F12 plus  
146 glutamax (Gibco), 1xNEAA (Life Technologies), 15% KSR (Life Technologies), 5  
147 ng/mL of basic FGF (Reprocell), 10 ng/mL of Activin A (Wako) and 2  $\mu$ M IWP-2  
148 (Stemgent) and the cells were incubated at 37°C overnight. The day of the medium  
149 change was set as Day 0. On the next day (Day 1), cells were passaged using CTKCa  
150 dissociation buffer (phosphate buffered saline containing 0.25% trypsin (BD Diagnostic  
151 Systems), 1 mg/ml of collagenase (Life Technologies), 20% KSR (Life Technologies),  
152 1 mM  $\text{CaCl}_2$ ) essentially as described by Sugimoto et al. [18]. The medium was

153 changed every day and cells were passaged every other day. For harvesting primed  
154 PSC-like cells, cells were dissociated by 0.25% Trypsin, 1 mM EDTA and the single  
155 cell suspension was used for single-cell capture or plate purification was done to  
156 remove feeder cells before harvesting.

157

### 158 **Single-cell capture, RT and cDNA synthesis**

159 For each sample 3,000 cells were loaded in a C1 single-cell Auto Prep array (Fluidigm,  
160 100-5760) for mRNA-sequencing (10–17  $\mu$ m). We processed samples of all time  
161 points following the Fluidigm manufacturer's instructions and recommended reagents  
162 (PN 100-7168 I1) as well as the C1 CAGE protocol

163 ([https://www.fluidigm.com/c1openapp/scripthub/script/2015-07/c1-cage-](https://www.fluidigm.com/c1openapp/scripthub/script/2015-07/c1-cage-1436761405138-3)

164 [1436761405138-3](https://www.fluidigm.com/c1openapp/scripthub/script/2015-07/c1-cage-1436761405138-3)) [23]. After priming the C1 array and loading of the cell mix we  
165 added a Calcein AM/ Ethidium homodimer-1 staining mix (LIVE/DEAD kit, Life  
166 Technologies). Both protocols follow the manufacturer guide to perform the cell mix  
167 loading, staining, loading of reagent mixes for lysis, reverse transcription, PCR  
168 amplification and cDNA harvest. We used External RNA Controls Consortium (ERCC)  
169 spike Mix 1 (Thermo Fisher, 4456740) [24] instead of ArrayControl RNA spikes.

170

### 171 **Single-cell capture imaging**

172 Imaging of the cell capture chambers was done in brightfield, green filter and red filter  
173 mode. Due to the different sample acquisition time points for both Fluidigm scRNA-  
174 Seq protocol and C1 CAGE two different imaging systems have been used. The first  
175 device was Cellomics ArrayScan VTI High Content Analysis Reader (Thermo  
176 Scientific) and it was applied as described elsewhere [25]. The main difference  
177 between the Cellomics platform and the follow up IN Cell Analyzer 6000 system (GE  
178 Healthcare) is the eased use in automated C1 array scans and the capability of the IN  
179 Cell Analyzer to take z-stacked images, which show a vertical cross section of the  
180 capture chamber. All images from the two platforms are available from SCPortalen at  
181 ([http://single-cell.clst.riken.jp/riken\\_data/mES2EpiSC\\_summary\\_view.php](http://single-cell.clst.riken.jp/riken_data/mES2EpiSC_summary_view.php)) [26]

182

### 183 **Library preparation and sequencing**

184 The optimal concentration range for harvested single-cell cDNA is between 0.1 to 0.3

185 ng/ $\mu$ L. In case of the Fluidigm scRNA-Seq protocol 2  $\mu$ L of each cell have been diluted  
186 in appropriate amounts of harvest dilution buffer based on prior picogreen (Thermo  
187 Fisher, P11496) cDNA concentration measurements for each cDNA cell sample. The  
188 workflow for the library preparation equally follows the Fluidigm manufacturer  
189 instructions and used reagents from Illumina (FC-131-1096, FC-131-1002). In brief,  
190 after cDNA sample dilution comes the tagmentation reaction, followed by an enzyme  
191 deactivation step and finally an indexing PCR for multiplexing samples. Fluidigm  
192 scRNA-Seq utilizes the Nextera XT index primer kit with 96 indices, whereas C1 CAGE  
193 uses a custom primer set [20](Invitrogen) instead of the kit's S index primer set. All  
194 samples are pooled after the index PCR and the pooled mix is purified using Agencourt  
195 AMPure XP magnetic beads as described in the Fluidigm manual. Prior to sequencing  
196 on Illumina HiSeq2500 we quantified all libraries (KAPA Library Quantification kit,  
197 KK4835) and adjusted the library concentration for loading on the flow cell to 9 pM.  
198 Library quality has been checked with Agilent High Sensitivity DNA kit (5067-4626)  
199 prior to loading on the flow cell. Fluidigm scRNA-Seq protocol samples were  
200 sequenced in high-output mode, paired end, 100 bases and C1 CAGE in high output  
201 mode, paired end, 50 bases.

202

### 203 **Fluidigm scRNA-Seq data processing**

204 All FASTQ files from Fluidigm scRNA-Seq runs were mapped using STAR v2.4.1d  
205 [27] against the GRCm38p4 reference genome and Gencode M8 as annotation  
206 reference. The mapping output was used for upload to ZENBU. We used Tagdust  
207 v2.13 [28] to remove library primer and adapter sequence artifacts, rRNA sequences,  
208 Spike sequences, and other non-desirable sequences before RNA-seq quantification.  
209 Estimates of RNA expression were generated with Kallisto v0.44.0 [29, 30] using  
210 Gencode M8 transcript IDs as reference. We combined the resulting single-cell  
211 expression matrices into two comprehensive matrices with single cells in columns and  
212 rows with gene level expression values as estimated counts and TPM values  
213 respectively.

214

### 215 **C1 CAGE sequence data processing**

216 Two different C1 CAGE data processing workflows have been applied. For the first,

217 C1 CAGE FASTQ files have been processed using the Moirai software platform [31]  
218 ([https://github.com/Population-Transcriptomics/C1\\_CAGE-preview/blob/master/OP-](https://github.com/Population-Transcriptomics/C1_CAGE-preview/blob/master/OP-)  
219 [WORKFLOW-CAGEscan-short-reads-v2.0.ipynb](https://github.com/Population-Transcriptomics/C1_CAGE-preview/blob/master/OP-WORKFLOW-CAGEscan-short-reads-v2.0.ipynb)). The Moirai pipeline creates BED12  
220 files for all C1 CAGE samples, which are used to make a CAGEexp object with the  
221 CAGER R Bioconductor package [32] (<https://rdrr.io/bioc/CAGER/>). We made a custom  
222 BED file for annotating expressed TSS in order to make a C1 CAGE gene expression  
223 matrix. The annotation BED file from refTSS [33] combines annotations from  
224 DRA000914 [34], the FANTOM5 mouse promotor and enhancer atlas  
225 (<https://fantom.gsc.riken.jp/data/>) and the Eukaryotic Promotor Database EPDnew  
226 mouse promotors ([https://epd.vital-it.ch/EPDnew\\_database.php](https://epd.vital-it.ch/EPDnew_database.php)), as well as Gencode  
227 M8. The gene expression matrix was generated with the CAGER function  
228 CTSSstoGenes. The resulting expression matrix was used to perform DEG analysis  
229 and k-means clustering analog to how it was done on Fluidigm scRNA-Seq data. This  
230 was done for direct comparison of Fluidigm scRNA-Seq and C1 CAGE data (Figure  
231 1D, S2A, 4A)

232

### 233 **Expression data analysis**

234 All expression data analysis was done on the respective gene expression matrices for  
235 Fluidigm scRNA-Seq and C1 CAGE after removing cells that fail quality controls and  
236 have been tagged for removal in the affiliated experimental metadata tables. Quality  
237 was assessed from various sources such as capture images, cDNA concentration or  
238 sequencing reads. Based on t-Distributed Stochastic Neighbor Embedding (t-SNE) k-  
239 means clusters we performed differential gene expression analysis between all  
240 clusters using the SCDE v2.10.1 R package [35]. Pseudotime analysis was done with  
241 TSCAN v1.20.0 [36] using the set of differentially expressed genes between the Day  
242 0 cells and the EpiSC cells and the differentially expressed genes between t-SNE k-  
243 means cluster 1 and 5 in case of pseudotime sorting of C1 CAGE samples.  
244 Hierarchical clustering heatmaps have been created with the pheatmap v1.0.12 R  
245 package [37]. Gene ontology analysis was done with the Enrichr web tool [38, 39]. Cell  
246 cycle assignment was done using a set of orthologous mouse genes based on the set  
247 from Whitfield et al. [40] with the phase scoring method described in [41]. All sample  
248 BAM files of the STAR alignment output and C1 CAGE BED12 files have been



249 uploaded to the ZENBU browser for expression visualization and data exploration [42]  
250 (Figure S1J).

251

### 252 **Promotor/ enhancer analysis**

253 A promotor/ enhancer expression matrix was constructed intersecting read 5' ends  
254 with FANTOM5 promotor/enhancer annotation using a second C1 CAGE data  
255 processing workflow (<https://fantom.gsc.riken.jp/data/>). The data were processed  
256 using Seurat [43] v3.1.1, excluding features detected in fewer than 3 cells and cells  
257 tagged for removal in metadata, and normalized with Seurat NormalizeData  
258 (normalization.method = "LogNormalize", scale.factor = 10000). Differential  
259 expression testing was performed with Seurat FindAllMarkers (min.pct = 0.05,  
260 logfc.threshold = 0.25, using a Wilcoxon Rank Sum test). Pseudotime analysis was  
261 performed with Slingshot v1.4.0, tradeSeq v1.1.03 and clusterExperiment v2.6.1:  
262 PCA1-30 of the top 10000 promotors/enhancers were clustered using Seurat  
263 FindClusters (algorithm = 4 (Leiden), resolution = 0.7). Pseudotime curve was  
264 generated with Slingshot getLineages using the previous PCA embeddings specifying  
265 the start and end cluster. NB-GAM model fit with Slingshot fitGAM (nknots=7) to the  
266 top 20% of features by variance across cells (4334 promotors and 341 enhancers).  
267 Consensus clustering of the expression patterns was performed with tradeSeq  
268 clusterExpressionPatterns (minSizes = 50) and merged with  
269 mergeClusters(mergeMethod="adjP",DEMethod="limma",cutoff=0.95) from into 5  
270 enhancer/promotor clusters.

271

### 272 **RNA-FISH and immunostaining**

273 RNA-FISH analysis of *Xist* RNA using strand-specific DNA probe and  
274 immunofluorescence analysis of H3K27me3 histone modifications were performed as  
275 described in Shiura and Abe [44].

276

### 277 **Allelic expression preprocessing**

278 The single nucleotide polymorphisms (SNPs) data for MSM/Ms was downloaded  
279 from NIG Mouse Genome Database (MSMv4HQ,  
280 <http://molossinus.lab.nig.ac.jp/msmdb/index.jsp>). We used X chromosome SNPs of

281 the coding region and filtered out multi allelic SNPs. The information about indels  
282 was also filtered out. The SNPs lifted over from the mm10 genome to the mm9  
283 genome with CrossMap-0.2.6 [45]. MSM/Ms mouse genome was reconstructed from  
284 mm9 using the SNPs with bigBedToBed  
285 ([http://hgdownload.soe.ucsc.edu/admin/exe/macOSX.x86\\_64/](http://hgdownload.soe.ucsc.edu/admin/exe/macOSX.x86_64/)) and SeqKit v0.7.0  
286 [46].

287

### 288 **Allelic expression analysis**

289 For allelic expression analysis, we aligned all reads to both B6 mouse genome  
290 (mm9) and MSM/Ms mouse genome independently using STAR-2.5.3a. We sorted  
291 and merged reads from both B6 and MSM using SAMtools version 1.5 [47]. Variant  
292 calling was performed using the Genome Analysis Toolkit (GATK) version 3.7-0-  
293 gcfedb67 [48]. Variant annotation was performed using SnpEff [49] /SnpSift [50] 4.3r  
294 (build 2017-09-06 16:41). To identify high-confidence SNPs, we considered only  
295 heterozygous bases present in dbSNP (build 128) and MSMv4HQ reference  
296 database. SNPs detected from B6 and MSM genome were collected.

297 The samtools mpileup command (pileup2base\_no\_strand.pl,  
298 <https://github.com/riverlee/pileup2base> ) was used to count the reads at each SNPs  
299 genomic position from the merged reads from both B6 and MSM.

300 We classified the reads with SNPs as biallelic, B6 monoallelic or MSM  
301 monoallelic. Allelic expression was measured as the total number of reads mapped  
302 on the B6 genome divided by the total number of reads for each SNP: Allelic-  
303 percentage = (B6 reads/(B6 + MSM) reads) \* 100 [%].

304

305 biallelic: allelic-percentage  $\geq 10$  or  $\leq 90$  [%]

306 B6 monoallelic: allelic-percentage  $> 90$  [%]

307 MSM monoallelic: allelic-percentage  $< 10$  [%]

308 Not detected: The reads were less than 10

309

310 We used two criteria to define the XCI state of each cell: one is biallelic expression  
311 ratio and the other is B6 and MSM monoallelic expression ratio. In clone 1E cells,

312 which are supposed to complete XCI, the biallelic expression ratio of each cell was  
313 found to be 11% or less. Therefore, cells with a biallelic ratio of 11% or less are defined  
314 as 'XCI', while the rest of the cells are defined as 'XC\_Active'. We also used the MSM  
315 and B6 monoallelic expression ratio for defining XCI state. The clone 1E cells, in which  
316 B6 chromosome X is inactivated, showed MSM monoallelic expression ratio of  $\geq 72\%$ .  
317 Thus, we defined the cells with B6 or MSM monoallelic expression ratio of more than  
318 72% as cells undergone rXCI. When both criteria were fulfilled, a cell was defined as  
319 either 'XCI' or 'XCI\_active'. If the two criteria are not fulfilled, a cell was classified as  
320 'XCI\_Intermediate'. Cells with less than 50 variants were labeled as 'No\_definition'.

321

322

## 323 **Results**

324

### 325 **Transition from naïve to primed pluripotency**

326 Naïve state to primed state transition was initiated by replacing ES cell culture medium  
327 with EpiSC medium containing an Wnt inhibitor, IWP-2, and the day of the medium  
328 change was set as Day 0. Cells at Day 0 showed typical morphologies of naïve ESCs,  
329 i.e. round and dome-shaped compact colonies (Figure S1A). These dome-shaped  
330 colonies were observed until Day 2 (Figure S1B, C) but larger and flatter colonies  
331 appeared from Day 3 on (Figure S1D, E). Morphologies of these flat colonies are  
332 similar to those of EpiSCs directly derived from post-implantation embryos (Figure  
333 S1F), indicating that primed PSC-like cells appear to form after Day 3. These primed  
334 PSC-like cells can be propagated stably for more than 12 passages (~22 days after  
335 the initiation of transition). From the primed PSC-like cells, clonal cell lines can be  
336 obtained. Those clones were also morphologically stable even after 20 passages.  
337 Addition of IWP-2 to the medium is highly effective for transition to primed type stem  
338 cells. Cells cultured in the medium containing IWP-2 were converted efficiently to the  
339 primed type cells, whereas high mortality was observed in cell culture without the Wnt  
340 inhibitor (Figure S1G, H). In this study, we used a female ES cell line derived from  
341 intersubspecific hybrid embryos, which can be used for XCI analysis. Taking  
342 advantage of numerous SNPs existing between the two subspecies, it is possible to  
343 perform allele-specific gene expression analysis. We also used a female EpiSC line  
344 as a reference primed PSCs [18]. In addition, we sampled the primed PSC-like cells  
345 at Day 22 (P10) and a clonal cell line isolated from the primed PSC-like cells (Clone  
346 1E), which underwent >20 passages.

347

### 348 **Single cell transcriptome analyses of the transition process using** 349 **scRNA-Seq and C1 CAGE**

350 We used scRNA-Seq on a time-course of pluripotent mESCs triggered to undergo the  
351 transition from a naïve to primed pluripotent state. In total we obtained 579 single cell  
352 transcriptome profiles via the Fluidigm scRNA-Seq protocol and 587 cells via C1  
353 CAGE (Figure 1A). These cells passed stringent quality screenings before applying  
354 computational analysis and represent sampling time points from a transition stage

355 between these two pluripotent states. They have been deeply sequenced with average  
356 3.1 million sequencing reads per cell for scRNA-Seq and 1 million reads for C1 CAGE  
357 respectively.

358 We observed a reduction of the median number of expressed genes within each  
359 group of time points after Day 2 from more than 8500 expressed genes to less than  
360 8000 genes (Figure 1B). Furthermore, the variability of expressed genes in individual  
361 cells was larger in cells from the Day 3, Day 4 and EpiSC group compared to earlier  
362 time points. Plotting the Spearman correlation of nearest cells [51] also shows a more  
363 variable distribution for the same groups (Figure 1C), thus indicating a global change  
364 in cellular expression profiles during the transition process from naïve to primed stem  
365 cells.

366 We also checked known marker genes of the naïve state (shown here *Esrrb*,  
367 *Nr0b1*, *Dppa4*, *Zfp42*), pluripotency markers (*Pou5f1*, *Sox2*) and primed state markers  
368 (*Sox4*, *Cd24a*, *Dnmt3b*) and could validate our data by matching the expression of  
369 these known markers with our time point samples (Figure 1D).

370 We performed differential gene expression analysis between the cells from the  
371 Day 0 mES group and the EpiSC group. This resulted in 950 significantly differentially  
372 expressed (DE) genes ( $p_{\text{adjust}} < 0.01$ ) between these groups (File S2) which allowed  
373 us to visualize our data via hierarchical cluster analysis (Figure 2A). Many genes  
374 appear to be specifically downregulated in the cluster 3 group (Figure 2A, Figure S7G,  
375 Figure S14A and S14B, File S3). Principal component analysis (PCA) demonstrates  
376 that PC1 and PC2 separate the cells depending on their developmental progression  
377 from naïve to primed (Figure 2B). The Day 0 to Day 2 samples form a dense cluster  
378 of cells, whereas after Day 2 cells start to show larger expression heterogeneity and  
379 thus distribute more widespread in the PCA plot. This observation is consistent with  
380 the wider distribution seen in Figure 1B and C. EpiSC cells are clustered together on  
381 the opposite side of the naïve cells, i.e. Day 0 (Figure 2B), and the Day 3 and Day 4  
382 samples are mapped in between Day 0 and EpiSC, indicating that these cells are in  
383 transition states. Next, we used t-SNE based on the same set of differentially  
384 expressed genes and applied a k-means clustering with 5 clusters to organize our cells  
385 into comparable groups (Figure 2C and 2D, Figure S4A). These cluster results were  
386 obtained after removing a group of 37 cells that formed a distinct sixth cluster via t-

387 SNE (Figure S2A). These cells were found to be contaminating feeder cells due to  
388 their expression of Y chromosome genes and the expression of the fibroblast marker  
389 *Vimentin* as well as their lack of *Pou5f1* expression (Figure S2B-F).

390 In order to rule out confounding effects contributed due to the cell cycle phase  
391 of cells we performed a cell cycle phase assignment based on the expression of known  
392 phase marker genes [43; 52]. The cell cycle distribution among the cells (Figure S3A  
393 and S3B) indicates that cell cycle did not contribute to the results obtained through  
394 pseudotime analysis.

395 We also used pseudotime analysis to determine the temporal order of cell  
396 samples from transitioning time points and overlaid the t-SNE plot with the pseudotime  
397 order of cells (Figure 2E, Figure S4B). This pseudotime sorting enabled us to  
398 determine the developmental trajectory of samples within the five k-means cluster  
399 groups. The pseudotime order reflects the actual time points of cell sampling and  
400 serves as a validation of temporal developmental order purely based on cellular gene  
401 expression profiles (Figure 2F).

402 Following the trajectory indicated by the pseudotime sorting, the developmental  
403 order of the clusters is 1, 2, 3, 4 and 5. Cluster 1 is mainly composed of Day 0 and  
404 Day 1 cells, representing mostly naïve pluripotent cells. The Day 2 cells are contained  
405 in both cluster 1 and cluster 2, indicating that the Day 2 cells are heterogenous and a  
406 fraction of the cells start transitioning their pluripotency state. Part of cluster 2 is  
407 composed of Day 3 and Day 4 cells. All the cells belonging to cluster 5 correspond to  
408 EpiSCs. Surprisingly, we found two intermediary clusters (3 and 4) between the naïve  
409 and the primed state. Cluster 3 contains mainly Day 3 and 4 cells, while cluster 4  
410 includes Day 3 and 4 as well as the primed PSC-like cells which have gone through  
411 10~20 more passages compared to Day 3 and 4 cells, i.e. P10 and Clone 1E (Figure  
412 2C and 2D). It should be noted that morphologies of P10 and Clone 1E cells are highly  
413 similar to those of EpiSCs, but the cluster 4 clearly demonstrates distinct expression  
414 profiles from those of cluster 5 according to the t-SNE results.

415

#### 416 **Characterization of t-SNE clusters based on single cell gene expression profiles**

417 After grouping cells into five clusters, we performed differential gene expression  
418 analysis between the clusters (File S2). As shown in Figure 3A, there is a large

419 increase in the number of significant DE genes between cluster 2 and 3, as well as 3  
420 and 4, suggesting that cluster 3 exhibits distinct expression profiles compared to other  
421 clusters. Expression of each DE gene can be visualized at single-cell resolution by  
422 overlaying single-cell expression levels onto the t-SNE map (Figure 3B, Figure S5). By  
423 manually examining such visualizations for 1044 selected DE genes, we identified  
424 genes specific to each cluster, as well as genes enriched in multiple clusters, or absent  
425 from all but one cluster. Based on these DE genes expression patterns, we can outline  
426 characteristics of each cluster.

427 Cluster 1 is enriched with naïve pluripotency genes such as *Esrrb* or *Zfp42*.  
428 Expression of these genes is also detected in cluster 2, thus they are not very specific  
429 to cluster 1. There are some genes highly enriched in cluster 1, e.g. *Nlrp4f* and  
430 *Arl14ep1*, whose expressions are detected predominantly in oocytes and  
431 preimplantation embryos [53].

432 Most of the DE genes in cluster 2 are expressed in other clusters as well. Many  
433 naïve pluripotency genes are heterogeneously expressed in this cluster and are  
434 downregulated as cell differentiation progresses. There are some genes, e.g.  
435 *Tmem59l* or *Car4*, whose expression is initiated in cluster 2 on and continued to be  
436 expressed until later stages, indicating naïve to primed conversion already  
437 commenced from this cluster. There are only a few genes exhibiting cluster 2-specific  
438 expression, e.g. *Wnt8a*.

439 The intermediary cluster 3 is characterized by specific downregulation of  
440 thousands of genes; approximately one third of the transcriptome shows  
441 downregulation in this cluster (Figure 2A, Figure S14A and S14B, File S3). Therefore,  
442 there are many examples for genes specifically downregulated in cluster 3 such as  
443 *Tmem263*, *Trp53* or *Ccnb2* (Figure S5, File S4). On the other hand, there is also a  
444 group of genes exhibiting specific upregulation only in this cluster, e.g. *H1fx*, *Itga7*,  
445 *Ccdc36* and *Rpph1*. Along this line, it is interesting to find cluster 3-specific expression  
446 of *Rn7sk*, which is a small nuclear RNA known to act as a transcriptional regulator in  
447 embryonic stem cells by decreasing the rate of RNA PolIII elongation and inhibiting the  
448 CDK9/Cyclin T complex [54, 55]. This observation can be an indicator that gene  
449 regulatory networks are re-configured in this transient state in order to prepare cells  
450 for later lineage commitment. Besides these genes unique to cluster 3, the cells in

451 cluster 3 show residual expression of naïve pluripotency genes and initial expression  
452 of primed marker genes same as cluster 2 cells.

453 In cluster 4 known primed marker genes are expressed, while naïve  
454 pluripotency gene expression has been almost diminished, suggesting their primed  
455 identity. In fact, known primed marker genes like *Fgf5* or *Pou3f1* are positives for  
456 cluster 4 as well as cluster 5, which is solely composed of EpiSCs. However, there are  
457 several genes expressed in clusters 2, 3 and 4, but greatly reduced in cluster 5. In  
458 particular, the cell adhesion molecule E-cadherin (*Cdh1*) is known to be expressed in  
459 naïve type ESCs, but not in primed EpiSCs [56]. *Cdh1* is clearly expressed in cluster  
460 4, while downregulated in cluster 5. Other genes like *Cyp24a1* or *Krt18* demonstrate  
461 cluster 4 specific expression as well, suggesting that cluster 4 cells have distinct  
462 expression profiles compared to those of cluster 5.

463 Cluster 5 is composed of only EpiSCs, therefore express primed PSC markers,  
464 many of which are shared by cluster 4 cells. However, there are genes whose  
465 expressions are specific to cluster 5, but not to cluster 4 cells. For example, expression  
466 of *Cdh2* which encodes N-cadherin or *Vim* which encodes vimentin are detected only  
467 in cluster 5. *Cdh2* and *Vim* are known to be involved in EMT, and the results suggest  
468 that cluster 5 cells have completed EMT, whereas cluster 4 cells have not. This is  
469 significant, because EMT is one of the hallmarks of naïve-to-primed transition [57]. In  
470 other words, this finding indicates that cluster 4 cells have not completed EMT,  
471 representing a novel, intermediate pluripotency state between naïve and primed  
472 pluripotency. In addition, we manually identified 54 cluster 5-specific genes (File S4);  
473 one of which is *Cd59a* representing a novel, highly specific EpiSC marker (Figure 3B,  
474 Figure S5).

475 Based on the significant DE genes we performed gene set enrichment analysis  
476 with the web-based Enrichr tool [39, 40]. We identified DE genes enriched in KEGG  
477 pathways (Figure S6). In the differences between cluster 1 and 2 we find genes linked  
478 to pluripotency maintenance, whereas cluster 3 vs 4 show many DE genes belonging  
479 to metabolic pathways and in the cluster 4 vs 5 differences we can see striking  
480 changes in genes linked to cell adhesion molecules, which suggests that cell surface  
481 properties of the cluster 4 and 5 are different.

482



## 483 **C1 CAGE revealed dynamic changes in promoter/enhancer activities during the** 484 **transition process**

485 Like the procedure used to cluster the Fluidigm scRNA-Seq derived data, we  
486 generated a t-SNE plot for the C1 CAGE data using 635 genes differentially expressed  
487 between Day 0 mES and EpiSC samples. Strikingly, we can independently validate  
488 our cluster results from the Fluidigm scRNA-Seq protocol with the C1 CAGE data.  
489 There are also two naïve k-means clusters (1 and 2), two transition stage clusters  
490 (cluster 3 and 4), as well as an EpiSC specific cluster (5) and a small cluster comprising  
491 of feeder or differentiated cells (6) (Figure 4A, S7G). Unlike the Fluidigm scRNA-Seq  
492 protocol C1 CAGE allows the detection of both non-poly adenylated transcripts and  
493 poly(A)+ RNA. Cluster 7 in the heat map consists of 48 histone gene transcripts, most  
494 of which show upregulated expression in the k-means cluster 4 and 5 (Figure 4B, File  
495 S3). Such a histone cluster upregulation is not detected by the Fluidigm scRNA-Seq,  
496 as they are mostly non-poly adenylated [58]. Due to the different priming strategies  
497 and thus in RNA capture between these protocols, there is a larger variability with  
498 regards to which expressed genes have been detected. Nevertheless, we could  
499 observe that marker genes are expressed appropriately in the clusters (Figure S7A-  
500 F). According to the results, the k-means clusters 1, 2, 3, 4, 5 generated from the C1  
501 CAGE data correspond to the clusters 1, 2, 3, 4, 5 of the scRNA-Seq analysis,  
502 respectively (Fig. 2D, Fig. 4A).

503 NASTs are a class of short, low abundance non-coding RNA expressed  
504 specifically in naïve ESCs [34]. We found that a number of NAST genes are expressed  
505 during the naïve-to-primed transition process, and some of them appear to be naïve  
506 state-specific downregulated upon entering the primed state, e.g. heatmap row cluster  
507 1 (Figure S7G). We can also observe a decrease in expression of many NASTs during  
508 the naïve to primed transition phase cluster 3 (Figure S7G). It is not well studied to  
509 what extent annotated NASTs may be part of annotated genes from other annotation  
510 sources and thus to what degree individual NASTs are genuinely unique genes.

511 With the C1 CAGE data we could demonstrate dynamic changes in single-cell  
512 promotor and enhancer usage during the naïve-to-primed conversion process (Figure  
513 4B, Figure S8A-B). There are enhancer RNAs (eRNAs) that show specificity for the  
514 naïve state, the transition period, and the primed state (Figure S8C).

515 In accordance with the findings from the scRNA-Seq data, C1 CAGE data also  
516 shows that TSS level (Transcription Start Site) expression is reduced in cluster 3  
517 (Figure 4B). Figure S9A shows the promoters exhibiting great reduction of expression  
518 only in the cluster 3 (Figure S9A), while nine promoters show specific upregulation in  
519 the cluster 3 (Figure S9B). We also identified 10 non-coding eRNAs downregulated in  
520 k-means cluster 3 and two eRNAs that are upregulated (Figure S9C), suggesting that  
521 the enhancer activities are also altered in the cluster 3 cells. Figure S10 shows the top  
522 nine differentially expressed promoters and enhancers for each C1 CAGE k-means  
523 cluster group.

524 We calculated pseudotimes for all cells based on TSS expression, using  
525 Slingshot [58] for C1 CAGE pseudotime analysis. We divided the Slingshot  
526 pseudotime scale into 10 bins. By comparing Slingshot pseudotime bins with k-means  
527 clusters and sampling time points (Figure S11A-C), we could show that the scRNA-  
528 Seq k-means cluster 3 corresponds to the Slingshot pseudotime bin 6 or [19.9-  
529 23.8](Figure S11D). Here we identified 5 modules of promoters and enhancers with  
530 similar expression patterns depicted along the Slingshot pseudotime bin (Figure 4C,  
531 Figure S12). Module 1 is active in the naïve state and the activities is decreased  
532 progressively as differentiation proceeds. Module 2 is constant until the bin 6 and  
533 declines thereafter. Other modules 3, 4 and 5 also show changes in their activities at  
534 around the bin 6, suggesting it corresponds to the transition point. These expression  
535 pattern modules of promoters and enhancers might correspond to gene regulatory  
536 networks interactions involved in establishment and maintenance of pluripotency  
537 states.

538

### 539 **X chromosome inactivation initiated at Day 3 as revealed by RNA-FISH and** 540 **scRNA-Seq**

541 As described before, the period between Day 2 and Day 3 corresponds to the transition  
542 point, where cells exit from a naïve state to a more differentiated state. To support this  
543 notion, we analyzed XCI status of cells, since XCI is one of the most reliable indicators  
544 of cell differentiation [59, 60] Random X chromosome inactivation (rXCI) is a  
545 phenomenon in which one of the two X chromosomes is randomly inactivated in a  
546 female mammalian cell during development [61]. It results in chromosome-wide

547 silencing of either the maternal or paternal X chromosome. Once established, the XCI  
548 pattern of individual cells will be clonally inherited to the daughter cells. The large non-  
549 coding RNA *Xist* is known to be involved in the initiation of XCI, leading to silencing of  
550 most X-linked genes except for escapees, genes known to be exempted from XCI. XCI  
551 is thought to occur as the cells exit from the naïve state, though precise timing of the  
552 XCI initiation has not been determined [44]. Since we obtained global expression  
553 profiles of single cells transitioning from naïve to primed, we reasoned that we could  
554 delineate progression of the XCI process, taking advantage of our *in vitro* transition  
555 system.

556 First, we conducted RNA-FISH analysis of *Xist* RNA expression (Figure 5A).  
557 The result indicates that *Xist* RNA clouds can increasingly be observed within nucleus  
558 of each cell from Day 3. Analysis of H3K27me3 deposits, another landmark of inactive  
559 X, also showed the same trend (Figure 5B). Next, we calculated and compared X  
560 chromosome/autosome (X/A) expression ratios in each single cell (Figure 5C). The  
561 ratio is close to 2 at Day 0, Day 1 and Day 2, whereas it decreased to about 1 after  
562 Day 3. This indicates that total expression levels of the X-linked genes are reduced to  
563 about half at Day 3 compared to Day 0, Day 1 and Day 2. These results suggest that  
564 XCI initiates between Day 2 and Day 3.

565

### 566 **Allele-specific expression analysis of X-linked genes during the transition** 567 **process**

568 To analyze allele specific gene expression, we developed a rXCI pipeline based on  
569 the detected variants. We detected 1570 SNPs in the transcripts and focused on the  
570 137 informative SNPs with reads > 10 expressed in at least 50% of the cells. As shown  
571 in Figure 6A, we colored allelic expression status for each gene; blue for maternal  
572 (MSM strain) allele, red for paternal (B6 strain) allele, green for biallelic expression and  
573 gray for not detected. We observed a trend that biallelic expression of each X-linked  
574 gene continues until Day 2, while mono-allelic expression of X-linked genes appears  
575 to increase from Day 3 onwards. At Day 4, more than half of the cells underwent rXCI.  
576 These findings demonstrate that rXCI begins at Day 3, thus supporting the RNA-FISH  
577 results. At Day 3 and Day 4, there are cells still showing biallelic expression (green),  
578 but P10 cells which have undergone 12 passages show much less biallelic expression,

579 suggesting that rXCI may be completed in these cells. Analysis of the clone 1E sample  
580 indicates that all the single cells derived from the same clone show the same allelic  
581 expression pattern of the X-linked genes as expected (Figure 6A).

582

### 583 **Identification of known and novel escape genes**

584 As just described, XCI is completed in P10 and clone 1E cells. However, several cells  
585 showing biallelic expression were detected in these cells and we noticed that most of  
586 the genes are known escape genes. Variants showing biallelic expression in at least  
587 two cells from P10 and 1E clone were identified as escape genes, and among them  
588 we found known escapees such as *Ddx3x*, *Eif2s3x*, *Kdm5c*, *Kdm6a* (Figure S13A).  
589 These results confirmed that our computational pipeline is appropriate for the analysis  
590 of XCI status. We also identified some genes (*Slc7a3*, *Hnrnpa1* or *Cetn2*) as potential  
591 novel escapee candidates. Furthermore, regardless of the cell type or the  
592 differentiation stage, genes expressed specifically from the B6 or MSM allele in almost  
593 all the single cells were detected. These are also considered to be escape genes, but  
594 their expressions are biased strongly to one of the two alleles. To validate our findings,  
595 we performed Sanger sequencing of several candidate genes and confirmed that  
596 *Cetn2*, *Slc7a3* and *Hnrnpa1* are novel escape genes whose expression is biased to  
597 one of the two alleles.

598

### 599 **rXCI analysis and pseudotime estimation suggests that rXCI initiation coincides 600 with global downregulation of gene expression**

601 Based on the bioinformatics analysis of the scRNA-Seq data, each cell was ordered  
602 along the pseudotime axis to identify the starting time of rXCI on the pseudotime axis  
603 (Figure 6B). Surprisingly, we observed a transient downregulation of many X-linked  
604 genes at a specific period during the transition. Such transient downregulations do not  
605 seem to be X-linked gene specific. A heatmap visualization of 21,777 autosomal genes  
606 shows that many of the genes are downregulated during this period (Figure S14A),  
607 while 965 X-linked genes show similar results (Figure S14B).

608 During the downregulation period, it is not possible to assess XCI status.  
609 However, cells undergone XCI begin to emerge after this downregulation period,  
610 implying that cells might have to go through the downregulation period to attain XCI.

611 To visualize the XCI state of each single cell in a different way, we first  
612 categorized the cells into four groups based on X chromosome states; i.e. XCI,  
613 XCI\_Intermediates, XC\_Active, No\_definition, according to the definition criteria  
614 described in the method section. The assigned XCI status of each cell was overlaid  
615 onto the t-SNE map (Figure 6C). Almost all the cluster 1 and 2 cells are XC active. On  
616 the other hand, all four categories of cells, especially considerable number of XCI cells,  
617 were identified in the cluster 3. It is interesting to find that *Xist* RNA expression is  
618 upregulated in some of the cluster 3 cells, whereas *Tsix*, antisense partner of *Xist* with  
619 repressive function on *Xist* expression, is being downregulated in the same cluster  
620 (Fig. S13B). There are more cells undergone XCI in the cluster 4 than in the cluster 3,  
621 while number of XCI\_Intermediate cells is similar to that of the XCI cells in the cluster  
622 4. In the cluster 4, cells corresponded to P10 or clone 1E (Figure 2C) represent mainly  
623 XCI cells, indicating that XCI is completed at later stages of the development. All the  
624 above results indicate that cells in the cluster 3 just exited from the naïve state begin  
625 to undergo XCI accompanied by a transient downregulation of gene expression not  
626 just limited to the X-chromosome, and that XCI process is more advanced in the cluster  
627 4 and almost completed in P10 and clone 1E cells.

628

629

## 630 **Discussion**

631

632 In this study, transcription dynamics of the naïve-to-primed transition process have  
633 been explored for the first time by using two different single-cell transcriptomics  
634 techniques, i.e. scRNA-Seq and C1 CAGE. The data obtained could thus generate a  
635 comprehensive catalog of genes exhibiting characteristic changes during the  
636 transition. Differential gene expression analysis identified known and novel marker  
637 genes that should be extremely useful for functional characterization of this  
638 developmental transition process. Interestingly, cluster analyses revealed  
639 intermediary subpopulations of cells in addition to the naïve and the primed PSCs. The  
640 presence of such subpopulations cannot be discovered by bulk expression analysis,  
641 emphasizing the merits of the single-cell technologies. Here we used female ESCs  
642 from intersubspecific hybrid embryos. Taking advantage of existing SNPs between the  
643 two subspecies of mice [62], we could perform allele-specific expression analysis at  
644 the single-cell level and adopted this technique for the analysis of the random X  
645 chromosome inactivation phenomenon.

646

### 647 **Discovery of transient global downregulation of gene expression in the** 648 **transition stage**

649 One of the most intriguing findings of this study is that approximately one third of the  
650 transcriptome (~6000 genes) is downregulated transiently and specifically in cells  
651 classified as the cluster 3 (Figures 2A, 4B, 6B). Both autosomal and X-linked genes  
652 showed this transient gene repression. The cluster 3 cells exhibited expression profiles  
653 highly divergent from those in cells of other identified clusters. This is probably due to  
654 the global gene repression occurring in those cells. Heterogeneities and high variation  
655 in expression profiles among cluster 3 cells may also be explained by different degrees  
656 of gene repression at the time of sample collection. Such a subpopulation of cells, i.e.  
657 cluster 3, was detected reproducibly in three different batches (two Day4 samples for  
658 scRNA-Seq and one C1 CAGE Day4) of samples by using two different single-cell  
659 technologies. Although the cluster 3 cells exhibited very distinct expression profiles,  
660 pseudotime analysis estimated the cluster 3 emerged just after cells exited from the  
661 naïve state. In fact, the cluster 3 cells express some of the naïve genes as well as

662 early markers for the primed state, suggesting that the cluster 3 cells position at an  
663 intermediate step between naïve and primed. Cell cycle assignment analysis indicated  
664 that the cluster 3 cells do not correspond to any specific cell cycle phase. There are  
665 many genes specifically downregulated in cluster 3, whereas those genes are highly  
666 expressed in other clusters. On the other hand, there is a set of genes exhibiting  
667 transient upregulation only in the cluster 3, which may provide clues to the global gene  
668 repression phenomenon in this cluster. One interesting example is *Rn7sk*, which  
669 encodes a small non-coding RNA involved in transcription repression. *Rn7sk* is an  
670 RNA component of a small nuclear ribonucleoprotein complex (snRNP) and known to  
671 inhibits the cyclin dependent kinase activity of the positive transcription elongation  
672 factor P-TEFb [54], acting as a gene-specific transcription repressor in ESCs [55]  
673 Therefore, it is possible that *Rn7sk* may contribute to the global gene repression  
674 occurring in the cluster 3. Experimental tests of this hypothesis are currently underway.

675

676 **The cluster 4 represents the third pluripotent stem cells with intermediate**  
677 **characteristics between naïve and primed**

678 The second unexpected finding in this study is the discovery of the cluster 4 (Figure  
679 2D). Cells in this cluster show morphologies similar to the primed PSCs and express  
680 a number of the primed state marker genes. However, bioinformatical analysis  
681 classified these cells to the cluster distinct from the EpiSC cluster, i.e. cluster 5, and  
682 the pathway analysis suggested that genes involved in cell adhesion are expressed  
683 differentially between the cluster 4 and 5. We noticed that the cluster 4 cells express  
684 *Cdh1* (E-cadherin) but do not express *Cdh2* (N-cadherin)(Figure S5). It is known that  
685 naïve PSCs undergo epithelial-mesenchymal transition (EMT) process, in which *Cdh1*  
686 expression of the naïve PSCs is replaced with *Cdh2* expression that is specific to the  
687 primed PSCs [64]. The absence of *Cdh2* expression in the cluster 4 cells suggests that  
688 the EMT may not be complete in these cells. Absence of *vimentin* expression in the  
689 cluster 4 supports this notion (Figure S2, S5). Since the completion of EMT is one of  
690 the criteria defining the EpiSCs, the cluster 4 cells stay at the stage prior to the EpiSC  
691 state and self-renew this cellular state. In other words, the cluster 4 cells may represent  
692 novel pluripotent stem cells in mice besides ESCs and EpiSCs, exhibiting an  
693 intermediate state between ESCs and EpiSCs. A third pluripotency state called

694 "formative" has previously been proposed [13]. The formative state is thought to be an  
695 intermediate state between naïve and primed, although the formative PSCs have not  
696 been established in mice. Whereas EpiLC [17] is suggested to be in the formative  
697 state, it is a transient cell type and not self-renewing stem cell unlike our cluster 4 cells.  
698 Our preliminary analysis suggests that EpiLC is more to the naïve state compared to  
699 the cluster 4 cells. Although stem cells with intermediary pluripotency states had been  
700 reported [65, 66], relationships of these cells with the formative state remain elusive.

701 Recently, it was reported that human naïve PSCs can acquire novel  
702 pluripotency comparable to the formative state, if the naïve cells are cultured in  
703 medium containing Wnt signaling inhibitor [14]. It is thus possible that our cluster 4  
704 cells represent a mouse counter part of their formative state cells. Formative state  
705 PSCs or PSCs cultured in the presence of Wnt inhibitor seem to have greater  
706 capacities for multi-lineage differentiation compared to the existing naïve or primed  
707 PSCs [18, 67, 68] and therefore those new versions of PSCs have a potential to  
708 replace the naïve or primed PSCs in stem cell sciences. However, research on those  
709 novel PSCs is still in its infancy and further studies must be conducted to elucidate its  
710 full potential. Comparison of the putative formative-like PSCs between human and  
711 mice should contribute to the understanding of this novel pluripotent state, and the  
712 cluster 4 cells of this study provide a good reference for these comparisons.

713

### 714 **Initiation of XCI coincides with emergence of the cluster 3**

715 In our *in vitro* experimental system, random XCI happens between the time points Day  
716 2 and Day 3. This was confirmed by RNA-FISH, immunostaining and allele-specific  
717 gene expression analysis at single cell resolution (Figure 5A-B). Allele-specific  
718 expression analysis enabled to classify each single cell arbitrarily into three categories,  
719 i.e. biallelic, intermediate and inactivated. Detailed analysis of these three categories  
720 of cells should yield important information about initiation and progression of this  
721 epigenetic reprogramming event. Moreover, the analysis could detect known and  
722 novel escaped genes as well as monoallelic expressed genes showing genetic-origin-  
723 dependency. Combined, random XCI appears to be initiated in cells of the cluster 3  
724 and more advanced in the cluster 4 cells. As described above, gene repression takes  
725 place in the cluster 3. Currently, we do not know whether this is just a coincidence or



726 indicative of mechanistic relationships between the two phenomena. Perturbation  
727 experiments for either one of the phenomena could help to infer whether these two are  
728 interdependent or not. There are precedents of the global gene repression: XCI in  
729 mammalian female embryos, meiotic chromosome inactivation during male  
730 spermatogenesis or global epigenomic changes in primordial germ cells [69, 70, 71,  
731 72]. Failures in these global repression phenomena lead to various abnormalities such  
732 as embryonic lethality and infertility, clearly indicating the biological importance of the  
733 global repression. Common feature of these phenomena is that they occur when cells  
734 undergo major epigenetic reprogramming events. Therefore, the cluster 3 cells should  
735 be analyzed with regards to epigenetic changes. In any case, our experimental system  
736 should provide unprecedented opportunity for the studies of global gene repression  
737 and epigenetic reprogramming.

738

### 739 **C1 CAGE: a single cell transcriptome profiling beyond scRNA-Seq**

740 In this study, we tried to use two different single cell expression profiling techniques  
741 and compared the results. Basically, the results from the two methods are highly  
742 consistent. In addition, as C1 CAGE can detect non-polyadenylated RNA, we were  
743 able to observe expression dynamics of eRNAs, histone mRNAs and NASTs during  
744 the transition process for the first time. Interestingly, some NASTs seem to show  
745 specificity only to the naïve pluripotency states. Perturbation experiments on the  
746 specific NASTs might help to shed light on the regulatory role of this class of non-  
747 coding RNA in naïve states. It is known that usage of enhancers changes during the  
748 naïve-primed transition [2, 3]. For example, it is well known that *Pou5f1* gene has both  
749 distal and proximal enhancers, of which proximal enhancer drives the primed state-  
750 specific expression [73]. In this particular case eRNA expression was not observed in  
751 our analysis. This may be due to either very low level or no expression of eRNAs in  
752 this locus, because even a bulk analysis using hundreds of cells conducted at the  
753 same time as the C1 CAGE analysis could not detect CAGE counts in this region.  
754 Thus, identification of enhancer should not rely on single parameter/technique alone.  
755 Nevertheless, the present C1 CAGE analysis could detect novel RNA expression at a  
756 number of enhancer regions annotated by FANTOM5 atlas, and some of which show  
757 specificities to either naïve or primed state, confirming the previous notion [2, 3].

758 Therefore, we consider the C1 CAGE data of this study a valuable resource for further  
759 studies on the regulatory roles of diverse classes of expressed non-coding RNAs  
760 including eRNAs in the early mammalian developmental process.  
761

762 **References**

- 763
- 764 1. Habibi E, Brinkman AB, Arand J, Kroeze LI, Kerstens HH, Matarese F, Lepikhov K, Gut M,  
765 Brun-Heath I, Hubner NC, Benedetti R, Altucci L, Jansen JH, Walter J, Gut IG, Marks H,  
766 Stunnenberg HG. Whole-genome bisulfite sequencing of two distinct interconvertible DNA  
767 methylomes of mouse embryonic stem cells. *Cell Stem Cell*. 2013;13:360-369. doi:  
768 10.1016/j.stem.2013.06.002.
- 769
- 770 2. Factor DC, Corradin O, Zentner GE, Saiakhova A, Song L, Chenoweth JG, McKay RD,  
771 Crawford GE, Scacheri PC, Tesar PJ. Epigenomic Comparison Reveals Activation of “Seed”  
772 Enhancers during Transition from Naïve to Primed Pluripotency. *Cell Stem Cell*.  
773 2014;14:854-863. doi: 10.1016/j.stem.2014.05.005.
- 774
- 775 3. Buecker C, Srinivasan R, Wu Z, Calo E, Acampora D, Faial T, Simeone A, Tan M, Swigut T,  
776 Wysocka J. Reorganization of enhancer patterns in transition from naïve to primed  
777 pluripotency. *Cell Stem Cell*. 2014;14:838-853. doi: 10.1016/j.stem.2014.04.003.
- 778
- 779 4. Ghimire S, Van der Jeught M, Neupane J, Roost MS, Anckaert J, Popovic M, Van  
780 Nieuwerburgh F, Mestdagh P, Vandesompele J, Deforce D, Menten B, Chuva de Sousa  
781 Lopes S, De Sutter P, Heindryckx B. Comparative analysis of naïve, primed and ground  
782 state pluripotency in mouse embryonic stem cells originating from the same genetic  
783 background. *Sci Rep*. 2018;8:5884. doi: 10.1038/s41598-018-24051-5.
- 784
- 785 5. Collier AJ, Panula SP, Schell JP, Chovanec P, Plaza Reyes A, Petropoulos S, Corcoran AE,  
786 Walker R, Douagi I, Lanner F, Rugg-Gunn PJ. Comprehensive Cell Surface Protein Profiling  
787 Identifies Specific Markers of Human Naïve and Primed Pluripotent States. *Cell Stem Cell*.  
788 2017;20:874-890. doi: 10.1016/j.stem.2017.02.014.
- 789
- 790 6. Hiratani I, Ryba T, Itoh M, Rathjen J, Kulik M, Papp B, Fussner E, Bazett-Jones DP, Plath K,  
791 Dalton S, Rathjen PD, Gilbert DM. Genome-wide dynamics of replication timing revealed by  
792 *in vitro* models of mouse embryogenesis. *Genome Res*. 2010;20:155-169. doi:  
793 10.1101/gr.099796.109.
- 794
- 795 7. Sperber H, Mathieu J, Wang Y, Ferreccio A, Hesson J, Xu Z, Fischer KA, Devi A, Detraux D,  
796 Gu H, Battle SL, Showalter M, Valensisi C, Bielas JH1, Ericson NG, Margaretha L, Robitaille  
797 AM, Margineantu D, Fiehn O, Hockenbery D, Blau CA, Raftery D, Margolin AA, Hawkins RD,  
798 Moon RT, Ware CB, Ruohola-Baker H. The metabolome regulates the epigenetic landscape

- 799 during naïve-to-primed human embryonic stem cell transition. *Nat. Cell Biol.* 2015;17:1523-  
800 1535. doi: 10.1038/ncb3264.
- 801
- 802 8. Takahashi S, Kobayashi S, Hiratani I. Epigenetic differences between naïve and primed  
803 pluripotent stem cells. *Cell Mol Life Sci.* 2018;75:1191-1203. doi: 10.1007/s00018-017-2703-  
804 x.
- 805
- 806 9. Wu J, Izpisua Belmonte JC. Dynamic pluripotent stem cell states and their applications. *Cell*  
807 *Stem Cell.* 2015;17:509-525. doi: 10.1016/j.stem.2015.10.009.
- 808
- 809 10. Kinoshita M, Smith A. Pluripotency deconstructed. *Dev Growth Differ.* 2018;60:44-51. doi:  
810 10.1111/dgd.12419.
- 811
- 812 11. Hanna J, Markoulaki S, Mitalipova M, Cheng AW, Cassady JP, Staerk J, Carey BW, Lengner  
813 CJ, Foreman R, Love J, Gao Q, Kim J, Jaenisch R. Metastable pluripotent states in NOD-  
814 mouse-derived ESCs. *Cell Stem Cell.* 2009;4:513-524. doi: 10.1016/j.stem.2009.04.015.  
815 Erratum in: *Cell Stem Cell.* 2009 Jul 2;5(1):124. *Cell Stem Cell.* 2015 May 7;16(5):566-7.
- 816
- 817 12. Han DW, Tapia N, Joo JY, Greber B, Araúzo-Bravo MJ, Bernemann C, Ko K, Wu G, Stehling  
818 M, Do JT, Schöler HR. Epiblast stem cell subpopulations represent mouse embryos of  
819 distinct pregastrulation stages. *Cell.* 2010;143:617-627. doi: 10.1016/j.cell.2010.10.015.
- 820
- 821 13. Smith A. Formative pluripotency: the executive phase in a developmental continuum.  
822 *Development.* 2017;144:365-373. doi: 10.1242/dev.142679.
- 823
- 824 14. Rostovskaya M, Stirparo GG, Smith A. Capacitation of human naïve pluripotent stem cells for  
825 multi-lineage differentiation. *Development* 2019;146:dev172916. doi: 10.1242/dev.172916.
- 826
- 827 15. Guyochin A, Maenner S, Chu ET, Hentati A, Attia M, Avner P, Clerc P. Live cell imaging of  
828 the nascent inactive X chromosome during the early differentiation process of naïve ES cells  
829 towards epiblast stem cells. *PLoS One.* 2014;9:e116109. doi: 10.1371/journal.pone.0116109.
- 830
- 831 16. Tosolini M, Jouneau A. From naïve to primed pluripotency: *in vitro* conversion of mouse  
832 embryonic stem cells in epiblast stem cells. *Methods Mol Biol.* 2016;1341:209-216. doi:  
833 10.1007/7651\_2015\_208.
- 834

- 835 17. Hayashi K, Ohta H, Kurimoto K, Aramaki S, Saitou M. Reconstitution of the mouse germ cell  
836 specification pathway in culture by pluripotent stem cells. *Cell*. 2011;146:519-532. doi:  
837 10.1016/j.cell.2011.06.052.  
838
- 839 18. Sugimoto M, Kondo M, Koga Y, Shiura H, Ikeda R, Hirose M, Ogura A, Murakami A, Yoshiki  
840 A, Chuva de Sausa Lopes SM, Abe K. A simple and robust method for establishing  
841 homogeneous mouse epiblast stem cell lines by Wnt inhibition. *Stem Cell Rep*. 2015;4: 744-  
842 757. doi: 10.1016/j.stemcr.2015.02.014.  
843
- 844 19. Pollen AA, Nowakowski TJ, Shuga J, Wang X, Leyrat AA, Lui JH, Li N, Szpankowski L,  
845 Fowler B, Chen P, Ramalingam N, Sun G, Thu M, Norris M, Lebofsky R, Toppani D, Kemp II  
846 DW, Wong M, Clerkson B, Jones BN, Wu S, Knutsson L, Alvarado B, Wang J,  
847 Weaver LS, May AP, Jones RC, Unger MA, Arnold R, Kriegstein AR, West JAA. Low-  
848 coverage single-cell mRNA sequencing reveals cellular heterogeneity and activated signaling  
849 pathways in developing cerebral cortex. *Nat. Biotechnol*. 2014; 10: 1053-1058. doi:  
850 10.1038/nbt.2967  
851
- 852 20. Kouno T, Moody J, Kwon AT, Shibayama Y, Kato S, Huang Y, Böttcher M, Motakis E,  
853 Mendez M, Severin J, Luginbühl J, Abugessaisa I, Hasegawa A, Takizawa S, Arakawa T,  
854 Furuno M, Ramalingam N, West J, Suzuki H, Kasukawa T, Lassmann T, Hon CC, Arner  
855 E, Carninci P, Plessy C, Shin JW. C1 CAGE detects transcription start sites and enhancer  
856 activity at single-cell resolution. *Nat. Commun*. 2019;10:360. doi: 10.1038/s41467-018-  
857 08126-5.  
858
- 859 21. Robin Andersson R, Gebhard C, Miguel-Escalada I, Hoof I, Bornholdt J, Boyd M, Chen Y,  
860 Zhao X, Schmidl C, Suzuki T, Ntini E, Arner E, Valen E, Li K, Schwarzfischer L, Glatz D,  
861 Raithel J, Lilje B, Rapin N, Bagger FO, Jørgensen M, Andersen PR, Bertin N, Rackham O,  
862 A. Burroughs M, J. Baillie K, Ishizu Y, Shimizu Y, Furuhashi E, Maeda S, Negishi Y, Mungall  
863 CJ, Meehan TF, Lassmann T, Itoh M, Kawaji H, Kondo N, Kawai J, Lennartsson A, Daub  
864 CO, Heutink P, Hume DA, Jensen TH, Suzuki H, Hayashizaki Y, Müller F, The  
865 FANTOM Consortium, Alistair R. R. Forrest ARR, Carninci P, Rehli M, Sandelin A. An atlas of  
866 active enhancers across human cell types and tissues *Nature* 2014; 507: 455-461. doi:  
867 10.1038/nature12787.  
868
- 869 22. Robertson EJ, Martin GR. Embryonic stem cells. In: EJ Robertson, editor. *Teratocarcinomas*  
870 *and embryonic stem cells: A practical approach*. Oxford: IRL Press; 1987. p. 205-224.

- 871
- 872 23. C1 CAGE protocol; <https://www.fluidigm.com/c1openapp/scripithub/script/2015-07/c1-cage->
- 873 1436761405138-3
- 874
- 875 24. Munro, S. A., Lund, S. P., Pine, P. S., Binder, H., Clevert, D. A., Conesa, A., Dopazo J,
- 876 Fasold M, Hochreiter S, Hong H, Jafari N, Kreil DP, Labaj PP, Li S, Liao Y, Lin SM, Meehan
- 877 J, Mason CE, Santoyo-Lopez J, Setterquist RA, Shi L, Shi W, Smyth GK, Stralis-Pavese N,
- 878 Su Z, Tong W, Wang C, Wang J, Xu J, Ye Z, Yang Y, Yu Y, Salit M. Assessing technical
- 879 performance in differential gene expression experiments with external spike-in RNA control
- 880 ratio mixtures. *Nat. Commun.* 2014;5:5125. doi: 10.1038/ncomms6125.
- 881
- 882 25. Böttcher M, Kouno T, Madissoon E, Motakis E, Abugessaisa I, Kato S, Suzuki H,
- 883 Hayashizaki Y, Kasukawa T, Carninci P, Lassman T, Shin JW, Plessy C. Single-cell
- 884 transcriptomes of fluorescent, ubiquitination-based cell cycle indicator cells. *BioRxiv.*
- 885 2016;088500. doi: <https://doi.org/10.1101/088500>.
- 886
- 887 26. Abugessaisa I, Noguchi S, Böttcher M, Hasegawa A, Kouno T, Kato S, Tada Y, Ura H, Abe
- 888 K, Shin JW, Plessy C, Carninci P, Kasukawa T. SCPortalen: human and mouse single-cell
- 889 centric database. *Nucleic Acids Res.* 2018;46:D781-D787. doi: 10.1093/nar/gkx949.
- 890
- 891 27. Dobin A, Davis CA, Schlesinger F, Drenkow J, Zaleski C, Jha S, Batut P, Chaisson M,
- 892 Gingeras TR. STAR: ultrafast universal RNA-seq aligner. *Bioinformatics.* 2013;29: 15-21. doi:
- 893 10.1093/bioinformatics/bts635.
- 894
- 895 28. Lassmann T, Hayashizaki Y, Daub CO. TagDust—a program to eliminate artifacts from next
- 896 generation sequencing data. *Bioinformatics.* 2009;25:2839-2840. doi:
- 897 10.1093/bioinformatics/btp527.
- 898
- 899 29. Bray NL, Pimentel H, Melsted P, Pachter L. Near-optimal probabilistic RNA-seq
- 900 quantification. *Nat. Biotechnol.* 2016;34:525-527. doi: 10.1038/nbt.3519. Erratum in: Near-
- 901 optimal probabilistic RNA-seq quantification. [*Nat Biotechnol.* 2016]
- 902
- 903 30. Ntranos V, Kamath GM, Zhang JM, Pachter L, David NT. Fast and accurate single-cell RNA-
- 904 seq analysis by clustering of transcript-compatibility counts. *Genome Biol.* 2016;17:112. doi:
- 905 10.1186/s13059-016-0970-8.
- 906

- 907 31. Hasegawa A, Daub C, Carninci P, Hayashizaki Y, Lassmann T. MOIRAI: a compact workflow  
908 system for CAGE analysis. *BMC bioinformatics*. 2014;15:144. doi: 10.1186/1471-2105-15-  
909 144.  
910
- 911 32. Haberle V, Forest ARR, Hayashizaki Y, Carninci P, Lenhard B. CAGEr: precise TSS data  
912 retrieval and high-resolution promoterome mining for integrative analyses. *Nucleic Acids Res.*  
913 2015; 43: e51. doi: 10.1093/nar/gkv054  
914
- 915 33. Abugessaisa, I., Noguchi, S., Hasegawa, A., Kondo, A., Kawaji, H., Carninci, P. and  
916 Kasukawa, T. refTSS: A Reference Data Set for Human and Mouse Transcription Start Sites.  
917 *J Mol Biol.* 2019;431: 2407-2422. doi: 10.1016/j.jmb.2019.04.045  
918
- 919 34. Fort A, Hashimoto K, Yamada D, Salimullah M, Keya CA, Saxena A, Bonetti A, Voineagu I,  
920 Bertin N, Kratz A, Noro Y, Wong CH, de Hoon M, Andersson R, Sandelin A, Suzuki H, Wei  
921 CL, Koseki H; FANTOM Consortium, Hasegawa Y, Forrest AR, Carninci P. Deep  
922 transcriptome profiling of mammalian stem cells supports a regulatory role for  
923 retrotransposons in pluripotency maintenance. *Nat. Genet.* 2014;46:558-566. doi:  
924 10.1038/ng.2965.  
925
- 926 35. Kharchenko PV, Silberstein L, Scadden DT. Bayesian approach to single-cell differential  
927 expression analysis. *Nat. Methods.* 2014;11:740-742. doi: 10.1038/nmeth.2967.  
928
- 929 36. Ji Z, Ji H. TSCAN: Pseudo-time reconstruction and evaluation in single-cell RNA-seq  
930 analysis. *Nucleic Acids Res.* 2016;44:e117. doi: 10.1093/nar/gkw430.  
931
- 932 37. Kolde R. pheatmap: Pretty Heatmaps R package version 1.0.12. [https://CRAN.R-](https://CRAN.R-project.org/package=pheatmap)  
933 [project.org/package=pheatmap](https://CRAN.R-project.org/package=pheatmap) (2019)  
934
- 935 38. Chen EY, Tan CM, Kou Y, Duan Q, Wang Z, Meirelles GV, Clark NR, Ma'ayan, A. Enrichr:  
936 interactive and collaborative HTML5 gene list enrichment analysis tool. *BMC bioinformatics.*  
937 2013;14:128. doi: 10.1186/1471-2105-14-128.  
938
- 939 39. Kuleshov MV, Jones MR, Rouillard AD, Fernandez NF, Duan Q, Wang Z, Koplev S, Jenkins  
940 SL, Jagodnik KM, Lachmann A, McDermott MG, Monteiro CD, Gundersen GW, Ma'ayan A.  
941 Enrichr: a comprehensive gene set enrichment analysis web server 2016 update. *Nucleic*  
942 *Acids Res.* 2016;44:W90-W97. doi: 10.1093/nar/gkw377.  
943

- 944 40. Whitfield ML, Sherlock G, Saldanha AJ, Murray JI, Ball CA, Alexander KE, Matese JC, Perou  
945 CM, Hurt MM, Brown PO, Botstein D. Identification of genes periodically expressed in the  
946 human cell cycle and their expression in tumors. *Mol Biol Cell*. 2002;13: 1977-2000. doi:  
947 10.1091/mbc.02-02-0030.
- 948
- 949 41. Tung, P.Y., Blischak, J.D., Hsiao, C.J., Knowles, D.A., Burnett, J.E., Pritchard, J.K. and  
950 Gilad, Y. Batch effects and the effective design of single-cell gene expression studies. *Sci*  
951 *Rep*. 2017;7:39921. doi: 10.1038/srep39921.
- 952
- 953 42. Severin J, Lizio M, Harshbarger J, Kawaji H, Daub CO, Hayashizaki Y; FANTOM  
954 Consortium, Bertin N, Forrest AR. Interactive visualization and analysis of large-scale  
955 sequencing datasets using ZENBU. *Nat. Biotechnol*. 2014;32:217-219. doi:  
956 10.1038/nbt.2840.
- 957
- 958 43. Butler, A., Hoffman, P., Smibert, P., Papalexi, E. and Satija, R. Integrating single-cell  
959 transcriptomic data across different conditions, technologies, and species. *Nat Biotechnol*.  
960 2018;36: 411-420. doi: 10.1038/nbt.4096
- 961
- 962 44. Shiura H, Abe K. Xist/Tsix expression dynamics during mouse peri-implantation development  
963 revealed by whole-mount 3D RNA-FISH. *Sci Rep*. 2019;9:3637. doi: 10.1038/s41598-019-  
964 38807-0.
- 965
- 966 45. Zhao H, Sun Z, Wang J, Huang H, Kocher JP, Wang L. CrossMap: a versatile tool for  
967 coordinate conversion between genome assemblies. *Bioinformatics*. 2014;30:1006-1007. doi:  
968 10.1093/bioinformatics/btt730.
- 969
- 970 46. Shen W, Le S, Li Y, Hu F. SeqKit: a cross-platform and ultrafast toolkit for FASTA/Q file  
971 manipulation. *PLoS One*. 2016;11:e0163962. doi: 10.1371/journal.pone.0163962.
- 972
- 973 47. Li H, Handsaker B, Wysoker A, Fennell T, Ruan J, Homer N, Marth G, Abecasis G, Durbin  
974 R. The sequence alignment/map format and SAMtools. *Bioinformatics* 2009;25:2078-2079.  
975 doi: 10.1093/bioinformatics/btp352.
- 976
- 977 48. McKenna, A., Hanna, M., Banks, E., Sivachenko, A., Cibulskis, K., Kernytsky, A., Garimella  
978 K, Altshuler D, Gabriel S, Daly M, DePristo MA. The Genome Analysis Toolkit: a MapReduce  
979 framework for analyzing next-generation DNA sequencing data. *Genome Res*. 2010;20:1297-  
980 1303. doi: 10.1101/gr.107524.110.



- 981
- 982 49. Cingolani P, Platts A, Wang LL, Coon M, Nguyen T, Wang L, Land SJ, Ruden, DM. A  
983 program for annotating and predicting the effects of single nucleotide polymorphisms, SnpEff:  
984 SNPs in the genome of *Drosophila melanogaster* strain w1118; iso-2; iso-3. *Fly*. 2012;6:80-  
985 92. doi: 10.4161/fly.19695.
- 986
- 987 50. Cingolani P, Patel VM, Coon M, Nguyen T, Land SJ, Ruden DM, Lu X. Using *Drosophila*  
988 *melanogaster* as a model for genotoxic chemical mutational studies with a new program,  
989 SnpSift. *Frontiers in Genetics* 2012;3:1-9. Doi: 10.2289/fgene.2012.00035.
- 990
- 991 51. Petropoulos S, Edsgård D, Reinius B, Deng Q, Panula SP, Codeluppi S, Reyes AP,  
992 Linnarsson S, Sandberg R, Lanner F. Single-cell RNA-seq reveals lineage and X  
993 chromosome dynamics in human preimplantation embryos. *Cell* 2016;165:1012-1026. doi:  
994 10.1016/j.cell.2016.03.023. Erratum in: Single-Cell RNA-Seq Reveals Lineage and X  
995 Chromosome Dynamics in Human Preimplantation Embryos. [*Cell*. 2016]
- 996
- 997 52. Macosko EZ, Basu A, Satija R, Nemes J, Shekhar K, Goldman M, Tirosh I, Bialas AR,  
998 Kamitaki N, Martersteck EM, Trombetta JJ, Weitz DA, Sanes JR, Shalek AK, Regev A,  
999 McCarroll SA. Highly Parallel Genome-wide Expression Profiling of Individual Cells Using  
1000 Nanoliter Droplets. *Cell* 2015; 161: 1202-1214. doi.org/10.1016/j.cell.2015.05.002
- 1001
- 1002 53. Peng H, Zhuang Y, Wu X, Li H, Hong Z, Zhang X, Lin X, Zhang W. Expression analysis of  
1003 Nlrp4a-Nlrp4f during mouse development. *J. Animal Veterinary Advances* 2013; 12:754-759.  
1004 Doi: 10.3923/javaa.2013.754.759.
- 1005
- 1006 54. Prasanth KV, Camiolo M, Chan G, Tripathi V, Denis L, Nakamura T, Hubner MR, Spector  
1007 DL. Nuclear Organization and Dynamics of 7SK RNA in Regulating Gene Expression. *Mol*  
1008 *Biol Cell*. 2010;21:4184-4196. doi: 10.1091/mbc.E10-02-0105.
- 1009
- 1010 55. Castelo-Branco G, Amaral PP, Engström PG, Robson SC, Marques SC, Bertone P,  
1011 Kouzarides T. The non-coding snRNA 7SK controls transcriptional termination, poising, and  
1012 bidirectionality in embryonic stem cells. *Genome Biol*. 2013;14:R98. doi: 10.1186/gb-2013-  
1013 14-9-r98
- 1014

- 1015 56. Ohtsuka S, Nishikawa-Torikai S, Niwa H. E-cadherin promotes incorporation of mouse  
1016 epiblast stem cells into normal development. *PLoS One* 2012;7:e45220.  
1017 Doi:10.1371/journal.pone.0045220.  
1018
- 1019 57. Pieters T, van Roy F. Role of cell-cell adhesion complexes in embryonic stem cell biology. *J*  
1020 *Cell Sci.* 2014;127:2603-2613, doi: 10.1242/jcs.146720.  
1021
- 1022 58. Lyons SM, Cunningham CH, Welch JD, Groh B, Guo AY, Wei B, Whitfield ML, Xiong Y,  
1023 Marzluff WF. A subset of replication-dependent histone mRNAs are expressed as  
1024 polyadenylated RNAs in terminally differentiated tissues. *Nucleic Acids Res.* 2016; 44: 9190-  
1025 9205. doi:10.1093/nar/gkw620.  
1026
- 1027 59. Street K, Risso D, Fletcher RB, Das D, Ngai J, Yosef N, Purdom E, Dudoit S. Slingshot: cell  
1028 lineage and pseudotime inference for single-cell transcriptomics. *BMC Genomics.* 2018; 19:  
1029 477. doi: 10.1186/s12864-018-4772-0  
1030
- 1031 60. Deuve JL, Avner P. The coupling of X-chromosome inactivation to pluripotency. *Annu Rev*  
1032 *Cell Dev Biol.* 2011;27:611-629. doi: 10.1146/annurev-cellbio-092910-154020.  
1033
- 1034 61. Payer B. Developmental regulation of X-chromosome inactivation. *Seminars in Cell Develop*  
1035 *Biol.* 2016;56:88-99. doi: 10.1016/j.semcd.2016.04.014.  
1036
- 1037 62. Pinheiro I, Heard E. X chromosome inactivation: new players in the initiation of gene  
1038 silencing. *F1000Research* 2017;6:344. doi: 10.12688/f1000research.10707.1.  
1039
- 1040 63. Abe K, Noguchi H, Tagawa K, Yuzuriha M, Toyoda A, Kojima T, Ezawa K, Saitou N, Hattori  
1041 M, Sakaki Y, Moriwaki, K, Shiroishi T. Contribution of Asian mouse subspecies *Mus*  
1042 *musculus molossinus* to genomic constitution of strain C57BL/6J, as defined by BAC-end  
1043 sequence–SNP analysis. *Genome Res.* 2004;14:2439-2447. doi: 10.1101/gr.2899304  
1044
- 1045 64. Altshuler A, Verbuk M, Bhattacharya S, Abramovich I, Haklai R, Hanna JH, Gottlieb E,  
1046 Shalom-Feuerstein R. RAS regulates the transition from naïve to primed pluripotent stem  
1047 cells. *Stem Cell Rep.* 2018;10:1088-1101. doi: 10.1016/j.stemcr.2018.01.004.  
1048

- 1049 65. Tsukiyama T, Ohinata Y. A modified EpiSC culture condition containing a GSK3 inhibitor can  
1050 support germline-competent pluripotency in mice. *PLoS One* 2014; 9: e95329.  
1051 doi:10.1371/journal.pone.0095329  
1052
- 1053 66. Neagu A, van Genderen E, Escudero I, Verwegen L, Kurek D, Lehmann J, Stel J, Dirks RAM,  
1054 van Mierlo G, Maas A, Eleveld C, Ge Y, den Dekker AT, Brouwer RWW, van IJcken WFJ,  
1055 Modic M, Drukker M, Jansen JH, Rivron NC, Baart EB, Marks H, ten Berge D. In vitro capture  
1056 and characterization of embryonic rosette-stage pluripotency between naive and primed  
1057 states. *Nat. Cell Biol.* 2020; 22: 534-545. doi: 10.1038/s41556-020-0508-x  
1058
- 1059 67. Wu J, Okamura D, Li M, Suzuki K, Luo C, Ma L, He Y, Li Z, Benner C, Tamura I, Krause MN,  
1060 Nery JR, Du T, Zhang Z, Hishida T, Takahashi Y, Aizawa E, Kim NY, Lajara J, Guillen P,  
1061 Campistol JM, Esteban CR, Ross PJ, Saghatelian A, Ren B, Ecker JR, Izpisua Belmonte JC.  
1062 An alternative pluripotent state confers interspecies chimaeric competency. *Nature.*  
1063 2015;521:316-321. doi: 10.1038/nature14413.  
1064
- 1065 68. Taelman J, Popovic M, Bialecka M, Tilleman L, Warriier S, Van der Jeught M, Menten B,  
1066 Deforce D, De Sutter P, Van Nieuwerburgh F, Abe K, Heindryckx, B., Chuva de Sousa Lopes  
1067 SM. WNT inhibition and increased FGF signalling promotes derivation of less heterogeneous  
1068 primed human embryonic stem cells, compatible with differentiation. *Stem cells and*  
1069 *development.* 2019;28:579-592. doi: 10.1089/scd.2018.0199.  
1070
- 1071 69. Robert Finestra T, Gribnau J. X chromosome inactivation: silencing, topology and  
1072 reactivation. *Current Opinion in Cell Biol.* 2017;46:54-61. doi: 10.1016/j.ceb.2017.01.007.  
1073
- 1074 70. Turner JMA. Meiotic sex chromosome inactivation. *Development.* 2007;134: 1823-1831. doi:  
1075 10.1242/dev.000018.  
1076
- 1077 71. Royo H, Polikiewicz G, Mahadevaiah SK, Prosser H, Mitchell M, Bradley A, de Rooij DG,  
1078 Burgoyne PS, Turner JM. Evidence that meiotic sex chromosome inactivation is essential for  
1079 male fertility. *Curr Biol.* 2010;20:2117-2123. doi: 10.1016/j.cub.2010.11.010.  
1080
- 1081 72. Seki Y, Yamaji M, Yabuta Y, Sano M, Shigeta M, Matsui Y, Saga Y, Tachibana M, Shinkai Y,  
1082 Saitou M. Cellular dynamics associated with the genome-wide epigenetic reprogramming in  
1083 migrating primordial germ cells in mice. *Development.* 2007;134: 2627-2638. doi:  
1084 10.1242/dev.005611.

1085

1086 73. Yeom YI, Fuhrmann G, Ovitt CE, Brehm A, Ohbo K, Gross M, Hübner K, Schöler HR.

1087 Germline regulatory element of Oct-4 specific for the totipotent cycle of embryonal cells.

1088 Development 1996; 122: 881-894.

1089

1090

1091

## 1092 **Abbreviations**

1093 PSC: pluripotent stem cell, XCI: X chromosome inactivation, EpiSC: epiblast stem cell,  
1094 eRNA: enhancer RNA, ESC: embryonic stem cell, EMT: epithelial-mesenchymal  
1095 transition, iPSC: induced pluripotent stem cell, EpiLC: epiblast-like cell, scRNA-Seq:  
1096 single-cell RNA-Seq, C1 CAGE: single-cell Cap Analysis of Gene Expression, GMEM:  
1097 Glasgow-Minimal Essential Medium, KSR: knockout serum replacement, FCS: fetal  
1098 calf serum, NEAA: non-essential amino acid, MEF: mouse embryonic fibroblast,  
1099 ERCC: External RNA Controls Consortium, t-SNE: t-Distributed Stochastic Neighbor  
1100 Embedding, SNP: single nucleotide polymorphism, GATK: Genome Analysis Toolkit,  
1101 NAST: non-annotated stem cell transcript, rXCI: random X chromosome inactivation,  
1102 snRNP: small nuclear ribonucleoprotein

1103

## 1104 **Availability of data and materials**

1105 All raw FASTQ sequencing files can be downloaded from DDBJ with the accession  
1106 numbers DRA010828 and DRA010829. All C1 capture array images as well as  
1107 additional files affiliated with the samples are available on SCPortalen [26]  
1108 ([http://single-cell.clst.riken.jp/riken\\_data/mES2EpiSC\\_summary\\_view.php](http://single-cell.clst.riken.jp/riken_data/mES2EpiSC_summary_view.php)). ZENBU  
1109 exploratory tracks can be found here after sign in:

1110 Fluidigm scRNA-Seq:

1111 <https://fantom.gsc.riken.jp/zenbu/gLyphs/#config=1qUudPWidNTgcknv0TJkp;loc=m>  
1112 [m10::chr12:86353254..86594021+](https://fantom.gsc.riken.jp/zenbu/gLyphs/#config=1qUudPWidNTgcknv0TJkp;loc=m)

1113 C1 CAGE:

1114 <https://fantom.gsc.riken.jp/zenbu/gLyphs/#config=bYYvK4ICEIFj8aWmkAJ7z;loc=m>  
1115 [m10::chr8:106586626..106686971+](https://fantom.gsc.riken.jp/zenbu/gLyphs/#config=bYYvK4ICEIFj8aWmkAJ7z;loc=m)

1116

## 1117 **Competing interests**

1118 The authors declare that they have no competing interests.

1119

## 1120 **Authors' contributions**

1121 KA and PC conceived the project. MK and HU maintained cell cultures. MB performed  
1122 all single-cell experiments. MB and IA managed the data. MB, JM and YT did  
1123 bioinformatics analysis, and IA, TK, CCH and KN helped with some parts. PC and KA

1124 supervised the project. MB, YT, JM and KA wrote the manuscript. All authors read and  
1125 approved the final manuscript.

1126

### 1127 **Acknowledgements**

1128 We thank Dr. M. Furuno for coordinating the project. We also thank Super Computer  
1129 Facilities of National Institute of Genetics, Mishima, Japan, as computations were  
1130 partially performed on the NIG Supercomputer. This work was supported by a grant  
1131 from the RIKEN Single Cell Project grant and in part by grants to KA from the Ministry  
1132 of Education, Culture, Sports and Technology of Japan. The project was also  
1133 supported in part by the RIKEN institutional budget to the RIKEN Center for Integrative  
1134 Medical Sciences and for the former Center for Life Science Technologies. MB was  
1135 supported by RIKEN as an International Program Associate.

1136

1137

1138 **Figure legends**

1139 Figure 1: Single-cell transcriptome profiling of a time course of mouse embryonic stem  
1140 cells undergoing naïve to primed transition. A) Outline of the experimental setup  
1141 showing the number of cells passing initial quality filtering for each time point for both  
1142 Fluidigm scRNA-Seq and C1 CAGE data. B) Distribution of the number of expressed  
1143 genes per time point of the scRNA-Seq data. Only genes expressed in more than 10  
1144 cells with a TPM > 1 are considered. C) Quality assessment via neighboring cell  
1145 similarities. D) Expression profiles of selected pluripotency related marker genes. Box  
1146 plots represent medians (center lines) with lower and upper quartiles. Whiskers  
1147 represent 1.5x the interquartile range. Outliers are represented as dots.

1148  
1149 Figure 2: Clustering and pseudotime sorting of scRNA-Seq data based on 950 DE  
1150 genes (p-adjusted < 0.01) between the mES and EpiSC time point samples. A)  
1151 Heatmap with cells sorted by t-SNE k-means cluster groups and pseudotime. Twenty  
1152 k-means gene clusters formed via hierarchical clustering. Expression scale  
1153  $\log_2(\text{TPM}+1) - \text{rowMeans}(\log_2(\text{TPM}+1))$ . B) PCA and C) t-SNE plot of all cells. D) Five  
1154 k-means cluster groups based on t-SNE data. E) Color coded pseudotime of all cells  
1155 within the t-SNE visualization. F) Pseudotime ordered cells grouped by sampling time  
1156 points and sample origin. Box plots represent medians (center lines) with lower and  
1157 upper quartiles. Whiskers represent 1.5x the interquartile range. Outliers are  
1158 represented as dots.

1159  
1160 Figure 3: Differential gene expression between t-SNE k-means clusters for marker  
1161 gene identification. A) Number of up and downregulated DE genes (p-adjusted < 0.01)  
1162 between clusters. B) Selected cluster specific genes for the naïve (*Nlrp4f*), transition  
1163 phase (*Rn7sk*) and primed state (*Cd59a*) shown as overlay of the t-SNE plot and the  
1164 expression plotted against the pseudotime scale.

1165  
1166 Figure 4: Clustering of the C1 CAGE data. A) t-SNE based on 635 DE genes (p-  
1167 adjusted < 0.01) between the mES and EpiSC time point samples. B) Changes in  
1168 promotor/enhancer expression detected by C1 CAGE during the time course.

1169 Heatmap with cells sorted by the t-SNE k-means cluster groups and Slingshot  
1170 pseudotime. 10 k-means gene clusters formed via hierarchical clustering.

1171 C) Five expression modules of promoters and enhancers from C1 CAGE data. Cells  
1172 pooled into 10 bins along a pseudotime axis generated with Slingshot. Promoters and  
1173 enhancers are clustered with tradeSeq/clusterExperiment.

1174

1175 Figure 5: RNA-FISH, immunostaining and dosage analysis of the X-linked genes  
1176 suggest that XCI initiates between Day 2 and Day 3 in our cell conversion system. A)  
1177 RNA-FISH of *Xist* RNA. Red signals were found only in intercellular space in Day 1,  
1178 indicating these were artifacts. Day 2 cells were mostly negative for the signal. In Day  
1179 3, *Xist*-positive cells appeared and increased in Day 4. B) Immunostaining for  
1180 H3K27me3 (red) and OCT4 (green)). Day 1 and Day 2 cells were negative for the  
1181 staining. Approximately 40% of nuclei in the Day 3 colony were positive for the  
1182 H3K27me3 signal, while majority of the nuclei were positive in the Day 4 colony. C)  
1183 Differences in ratios of X-chromosome expression levels to autosomal expression  
1184 levels, from mESCs to EpiSCs. Box plots represent medians (center lines) with lower  
1185 and upper quartiles. Whiskers represent 1.5x the interquartile range. Outliers are  
1186 represented as dots.

1187

1188 Figure 6: Allele specific expression analysis at the single-cell level revealed  
1189 heterogeneity of XCI status among cells. A) Heatmap representing allele-specific  
1190 expression from mESCs to ESC-derived primed PSC-like cells of X-linked genes. Red:  
1191 specifically expressed from B6 allele (allelic percentage > 90%); Green: biallelically  
1192 expressed (allelic percentage <= 90%, >= 10%); Blue: specifically expressed from  
1193 MSM allele (allelic percentage < 10%). Gray colors were shown for data not available  
1194 (less than 10 reads). SNPs are ordered based on genomic position. N = 137  
1195 informative SNPs. B) Pseudotime-ordered heatmap representing allele-specific  
1196 expression which indicates the onset of rXCI. C) XCI status plotted onto the t-SNE  
1197 clustering reveals coordinated XCI during stem cell conversion process.

1198

1199



1200 **Additional files**

1201 Figure S1: Microscopic images of the cell culture at each time point. A) Day 0, B) Day  
1202 1, C) Day 2, D) Day 3, E) Day 4, F) EpiSC derived from embryos. Morphologies of  
1203 cells transitioned with (G) and without IWP-2 (H). Photos were taken at Day 4. I)  
1204 Cellular morphologies of clone 1E cells. J) Screen capture of Zenbu browser  
1205 expression histograms of *Pou5f1* locus.

1206

1207 Figure S2: A) Initial t-SNE clustering of scRNA-Seq data based on 916 DE genes (p-  
1208 adjusted < 0.01) between the mES and EpiSC time point samples. B - F) Expression  
1209 of selected genes plotted onto the t-SNE clustering. B) and C) are Y-linked genes. A  
1210 cluster of cells marked by dotted circle likely corresponds to contaminated feeder cells.

1211

1212 Figure S3: Cell cycle analysis of Fluidigm scRNA-Seq data. Cell cycle scoring based  
1213 on 176 phase marker genes [40]. A) Each cell's estimated cycle phase plotted onto  
1214 the t-SNE clustering. B) Pie charts showing cell cycle distribution per t-SNE k-means  
1215 cluster.

1216

1217 Figure S4: Alternative PCA visualizations. A) t-SNE k-means cluster groups overlaid  
1218 onto PCA plot. B) Color coded pseudotime of all cells within the PCA plot.

1219

1220 Figure S5: Expression of selected DE genes between all t-SNE k-means clusters  
1221 plotted onto the t-SNE clustering. Shown are genes that are either specific to a k-  
1222 means cluster or absent from a cluster. A) and B) enriched in cluster 1, i.e. naïve-  
1223 specific. C) specific to cluster 2. D) an example of gene upregulated from cluster 2 on  
1224 except for cluster 3. E) and F) examples of genes expressed in all the clusters except  
1225 for cluster 3. G) and H) examples of genes enriched in cluster 3 but not in other  
1226 clusters. I) and J) genes known for their specificity to primed PSCs. K), L), M) and N)  
1227 genes related to EMT. O) and P) examples of genes with specificity to cluster 4.

1228

1229 Figure S6: Enrichr gene set enrichment analysis based on DE genes from t-SNE k-  
1230 means cluster comparisons. A) KEGG Pathways enriched in DE genes between  
1231 cluster 1 and cluster 2. B) Pathways enriched in DE genes between cluster 2 and

1232 cluster 3. C) Pathways enriched in DE genes between cluster 3 and cluster 4. D)  
1233 Pathways enriched in DE genes between cluster 4 and cluster 5.

1234

1235 Figure S7: Clustering and expression visualization of C1 CAGE data. A - F) Expression  
1236 of selected genes between k-means clusters 1-5 plotted onto the t-SNE clustering. G)  
1237 Heatmap of DE NASTs between the mES and EpiSC time point samples. Cells sorted  
1238 by t-SNE k-means cluster groups and pseudotime. Twenty k-means NAST clusters  
1239 formed via hierarchical clustering. Expression scale  $\log_2(\text{count}+1)$  -  
1240  $\text{rowMeans}(\log_2(\text{count}+1))$ .

1241

1242 Figure S8: Promoters and enhancers differentially expressed at sample time points  
1243 A) Dotplot of gene promoters with significantly upregulated (Wilcoxon Rank Sum test  
1244 , Bonferroni adjusted  $p < 0.05$ ) expression in one time point. B) Dotplot of enhancer  
1245 loci with significantly upregulated (Wilcoxon Rank Sum test, Bonferroni adjusted  $p <$   
1246  $0.05$ ) expression in one time point. C) Expression of selected enhancers from B) left:  
1247 smoothed expression along the pseudotime, right: percentage of cells where the  
1248 enhancer was detected in each time point.

1249

1250 Figure S9: Promoters and enhancers differentially expressed in C1 CAGE k-means  
1251 cluster 3. A) Dotplot of the top 12 differentially expressed promoters during the time  
1252 course, all are downregulated in k-means cluster 3. B) Dotplot of significantly  
1253 upregulated gene promoters in k-means cluster 3. (Wilcoxon Rank Sum test,  
1254 Bonferroni adjusted  $p < 0.05$ ). C) Dotplot of all differentially expressed enhancers when  
1255 comparing k-means clusters (Wilcoxon Rank Sum test, Bonferroni adjusted  $p < 0.05$ ).

1256

1257 Figure S10: Promoters and enhancers differentially expressed during the Slingshot  
1258 pseudotime. A - E) The top 9 differentially expressed promoters or enhancers from  
1259 each k-means cluster group plotted across the Slingshot pseudotime.

1260

1261 Figure S11: Relationship between time point, C1 CAGE k-means clusters, and  
1262 Slingshot pseudotime. A) Barplot where cells from each k-means cluster appear on  
1263 the Slingshot pseudotime. B) Barplot where cells from each time point appear on the

1264 Slingshot pseudotime. C) Barplot where cells from each pseudotime bin appear on the  
1265 Slingshot pseudotime. D) Number of cells from each k-means cluster appearing in  
1266 each pseudotime bin.

1267

1268 Figure S12: Enhancers differentially expressed during the Slingshot pseudotime. All  
1269 differentially expressed enhancers from each expression module of Fig. 4C plotted  
1270 across the Slingshot pseudotime.

1271

1272 Figure S13: Single-cell allelic expression analysis detected escape genes. A) In this  
1273 bar graph: black shows known escape genes, red shows novel biased escape genes  
1274 and false-positive results are shown in green. Each line indicates the position on the  
1275 X chromosome. B) Expression of *Tsix* and *Xist* plotted onto the t-SNE clustering. The  
1276 cluster 3 cells are marked by the dotted circle.

1277

1278 Figure S14: Global downregulation of genes in Fluidigm scRNA-Seq t-SNE k-means  
1279 cluster 3. Heatmaps with A) autosomal genes and B) X linked genes. Cells sorted by  
1280 t-SNE k-means cluster groups and pseudotime. Twenty k-means gene clusters formed  
1281 via hierarchical clustering. Expression scale  $\log_2(\text{TPM}+1) - \text{rowMeans}(\log_2(\text{TPM}+1))$ .

1282

1283 Table S1: This 2-column table contains the cell\_id and the cell cycle phase assigned  
1284 to each cell\_id.

1285

1286 Table S2: Gene information parsed from the M8 Gencode GTF reference file. This  
1287 table was used to filter genes by chromosomes.

1288

1289 File S1: This zip file contains all scRNA-Seq and C1 CAGE metadata files, expression  
1290 tables and tables containing t-SNE dimensions and k-means clusters that have been  
1291 used to create figures. The metadata file discard column can be used to remove all  
1292 cells that fail quality criteria. These cells are tagged as TRUE. All analysis was done  
1293 on the subset that is tagged as discard FALSE.

1294

1295 File S2: Zip file containing all tables for differential gene expression results.

1296

1297 File S3: Zip file containing heatmap related tables for Figure 2A, 4B, S7G and S14A-  
1298 B. These tables list all genes for each of the heatmap k-means clusters.

1299

1300 File S4: All t-SNE visualizations overlaid with expression of selected genes. Examples  
1301 are shown in Figure S5.

1302

1303 File S5: Tables providing variant position, allelic expression status and other  
1304 information related to Figure 6A-C.

1305

1306 File S6: Various source code files.

1307

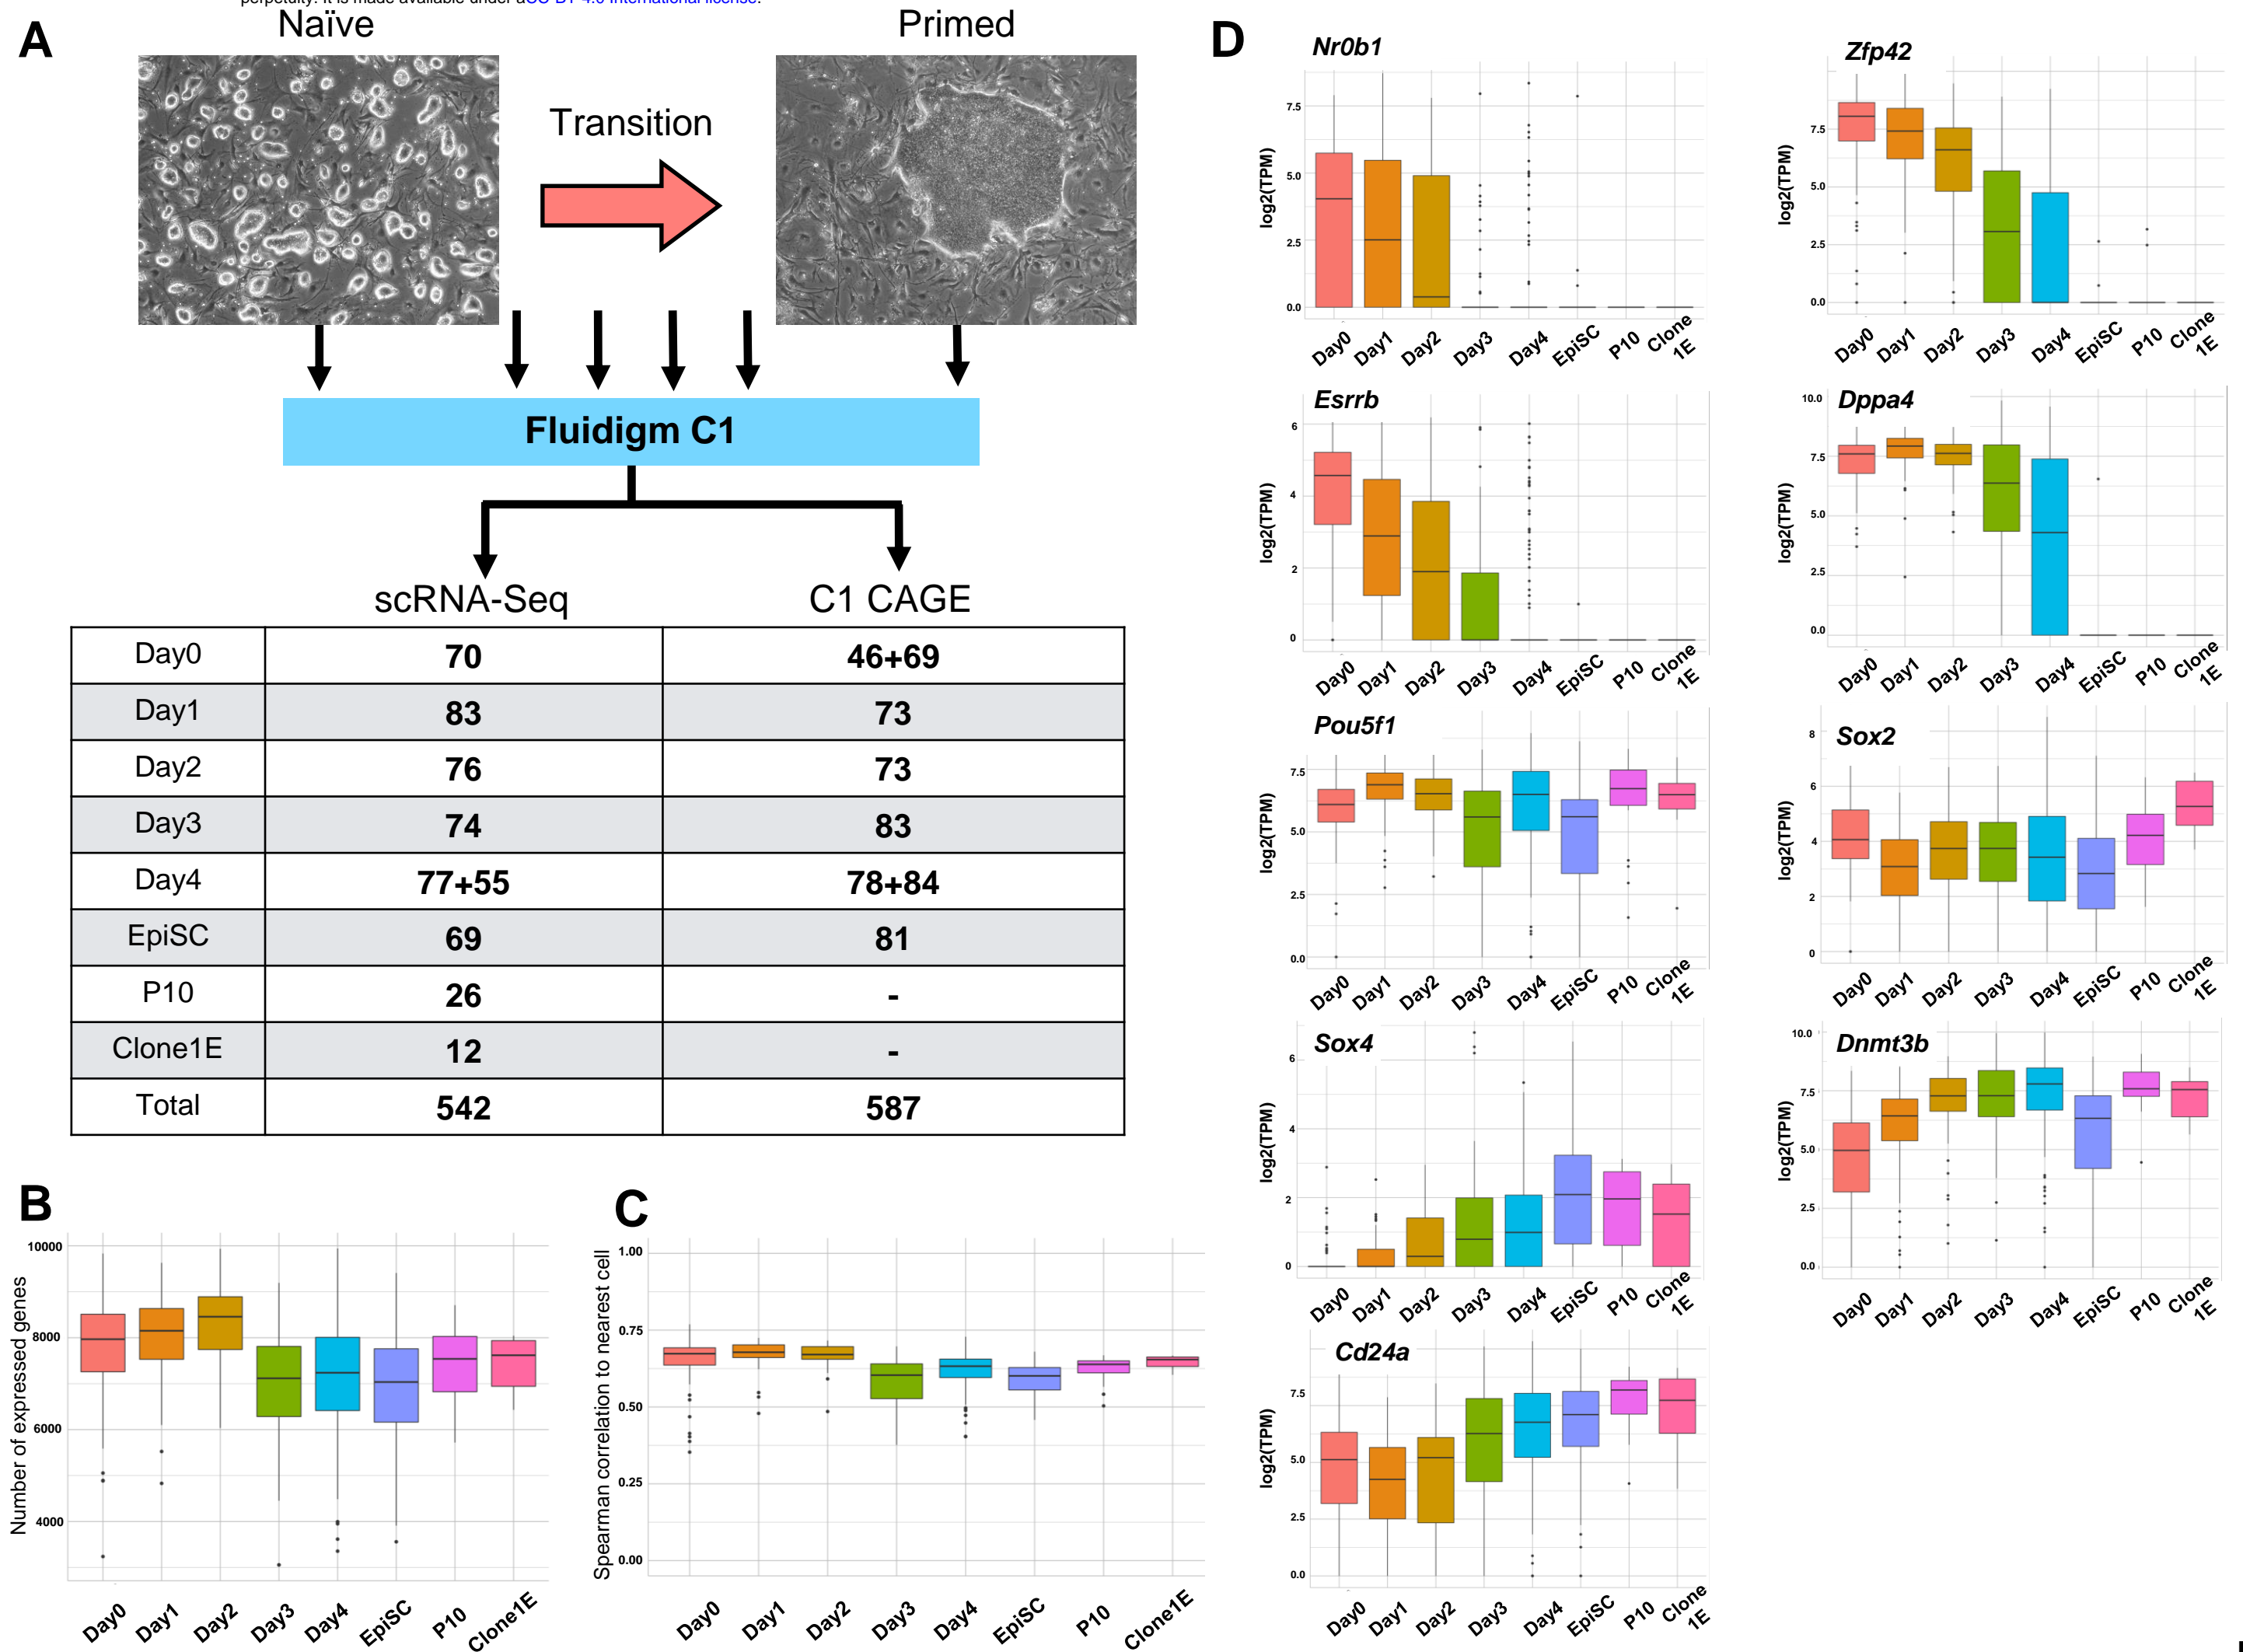

Fig. 1

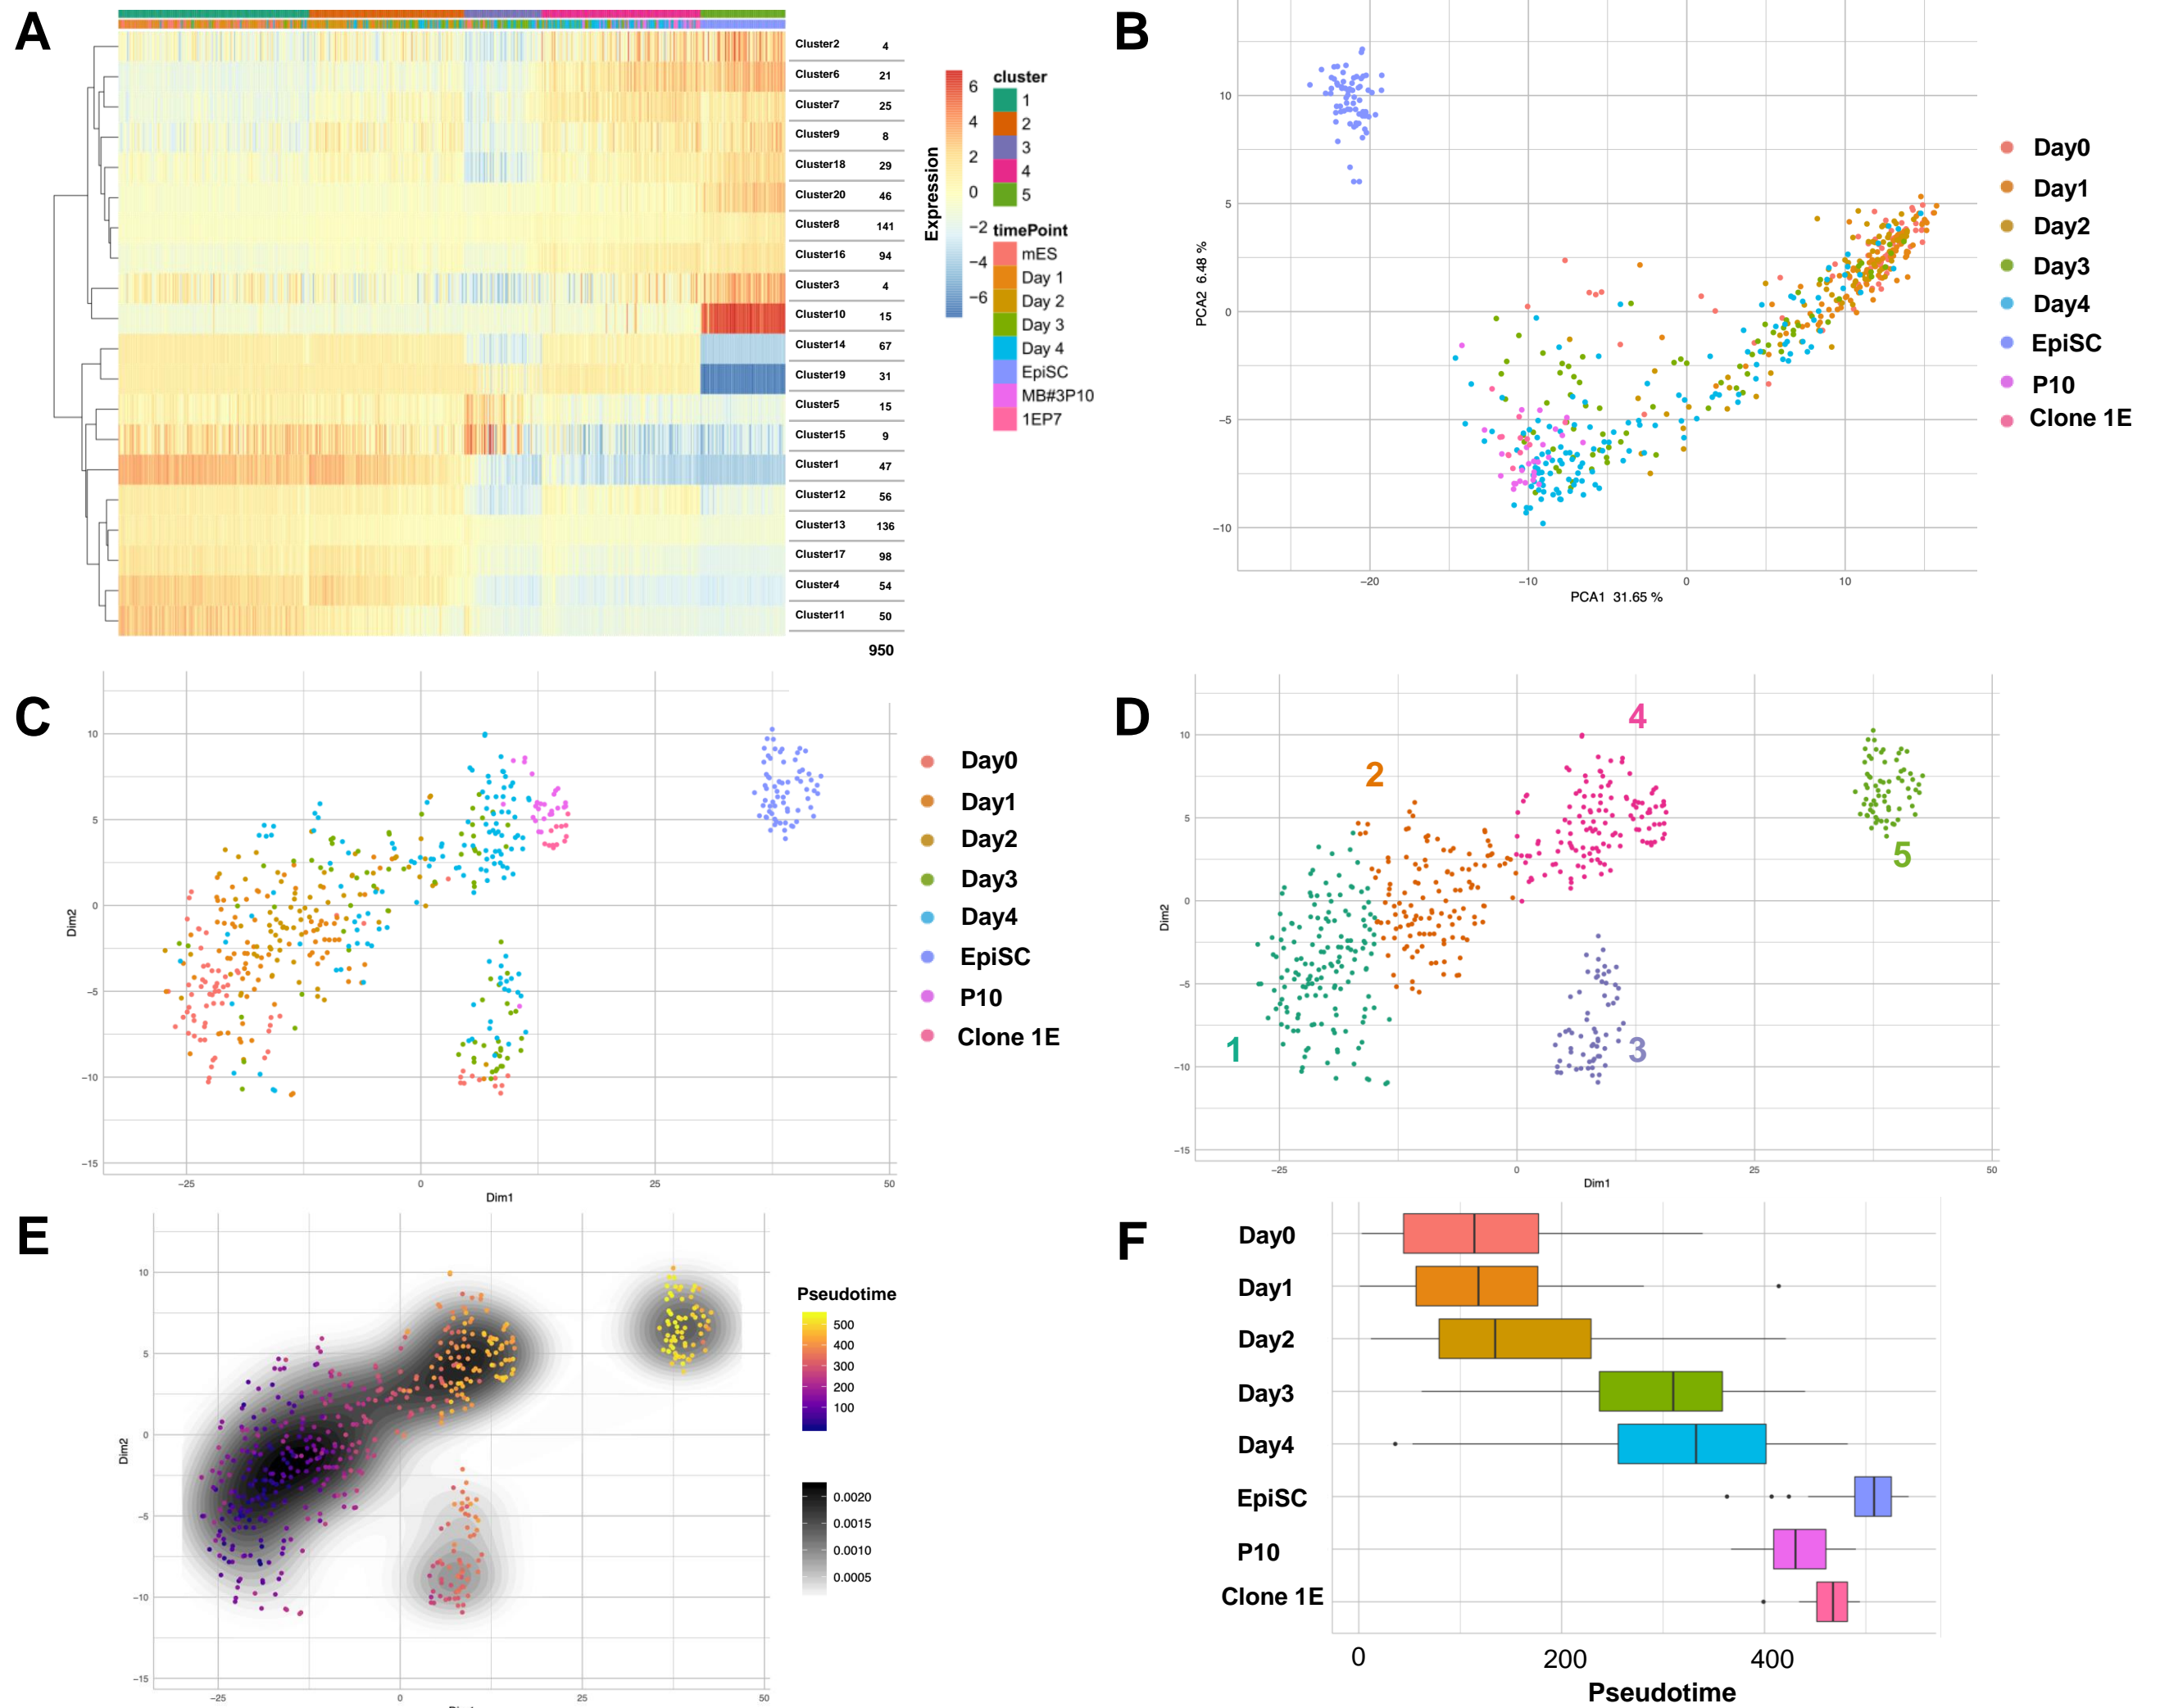

Fig. 2

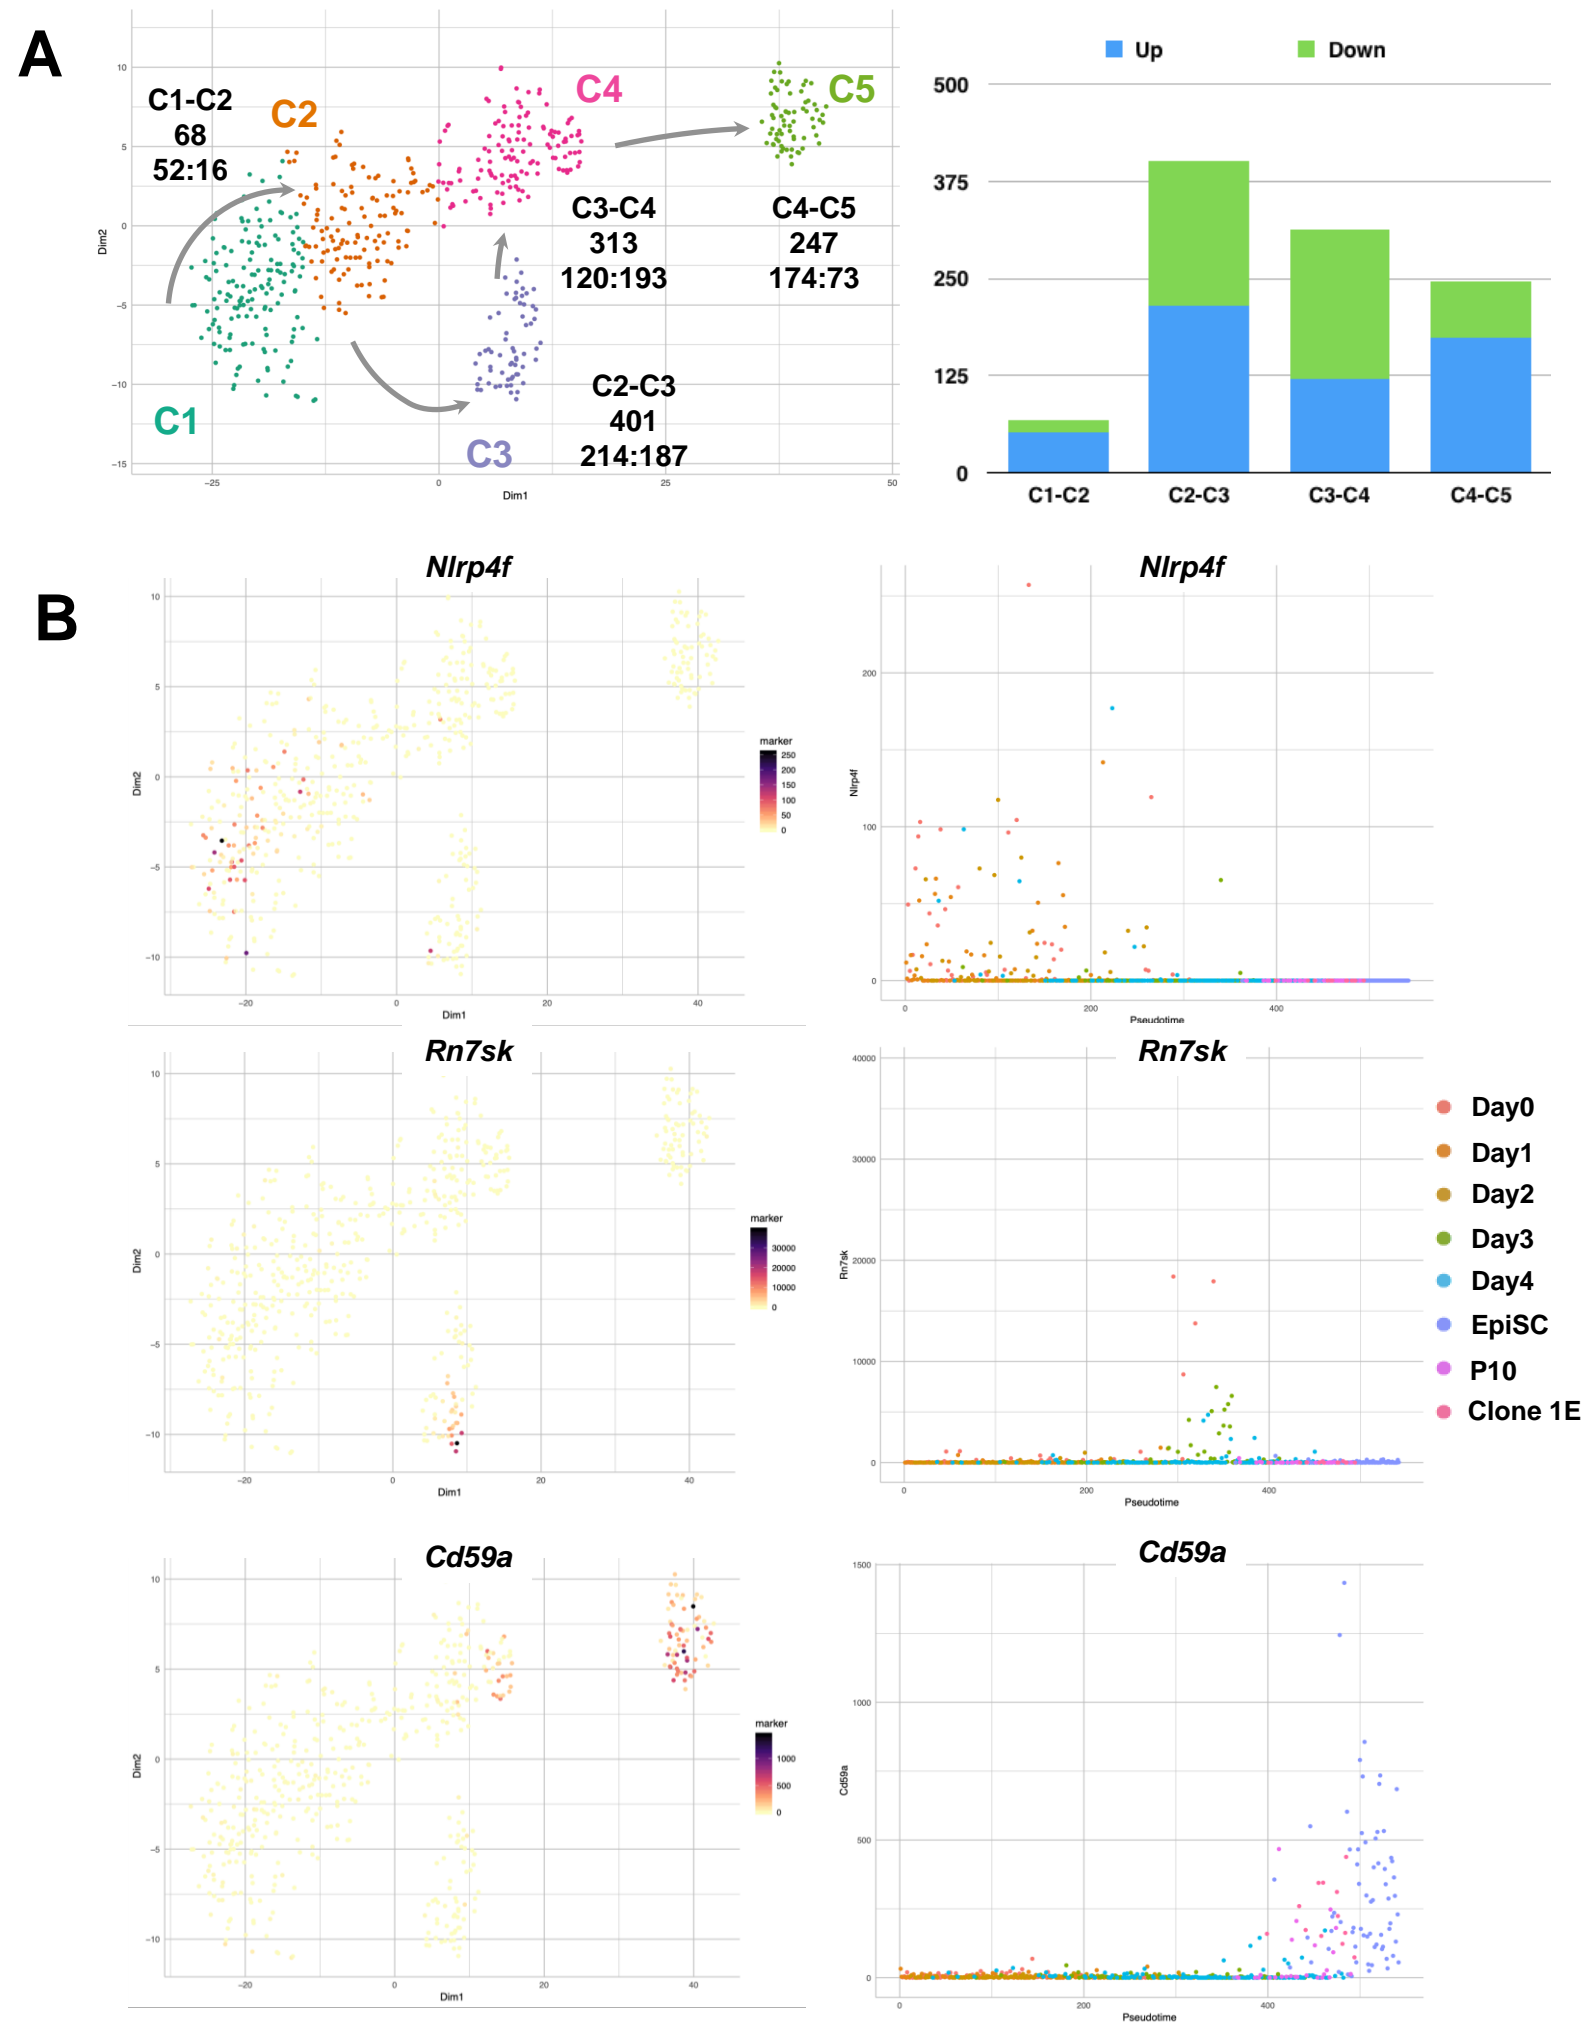

Fig. 3

**A**

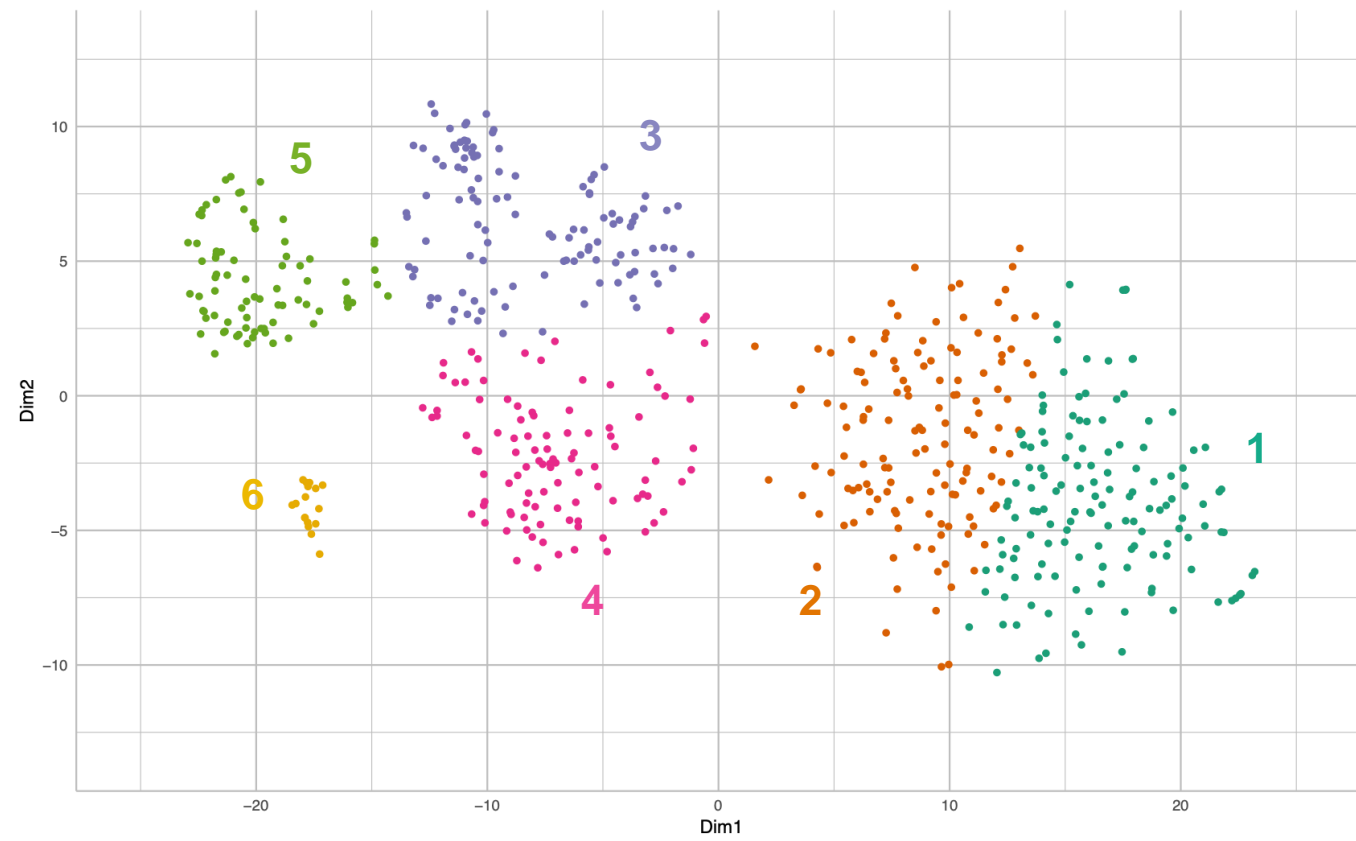

**B**

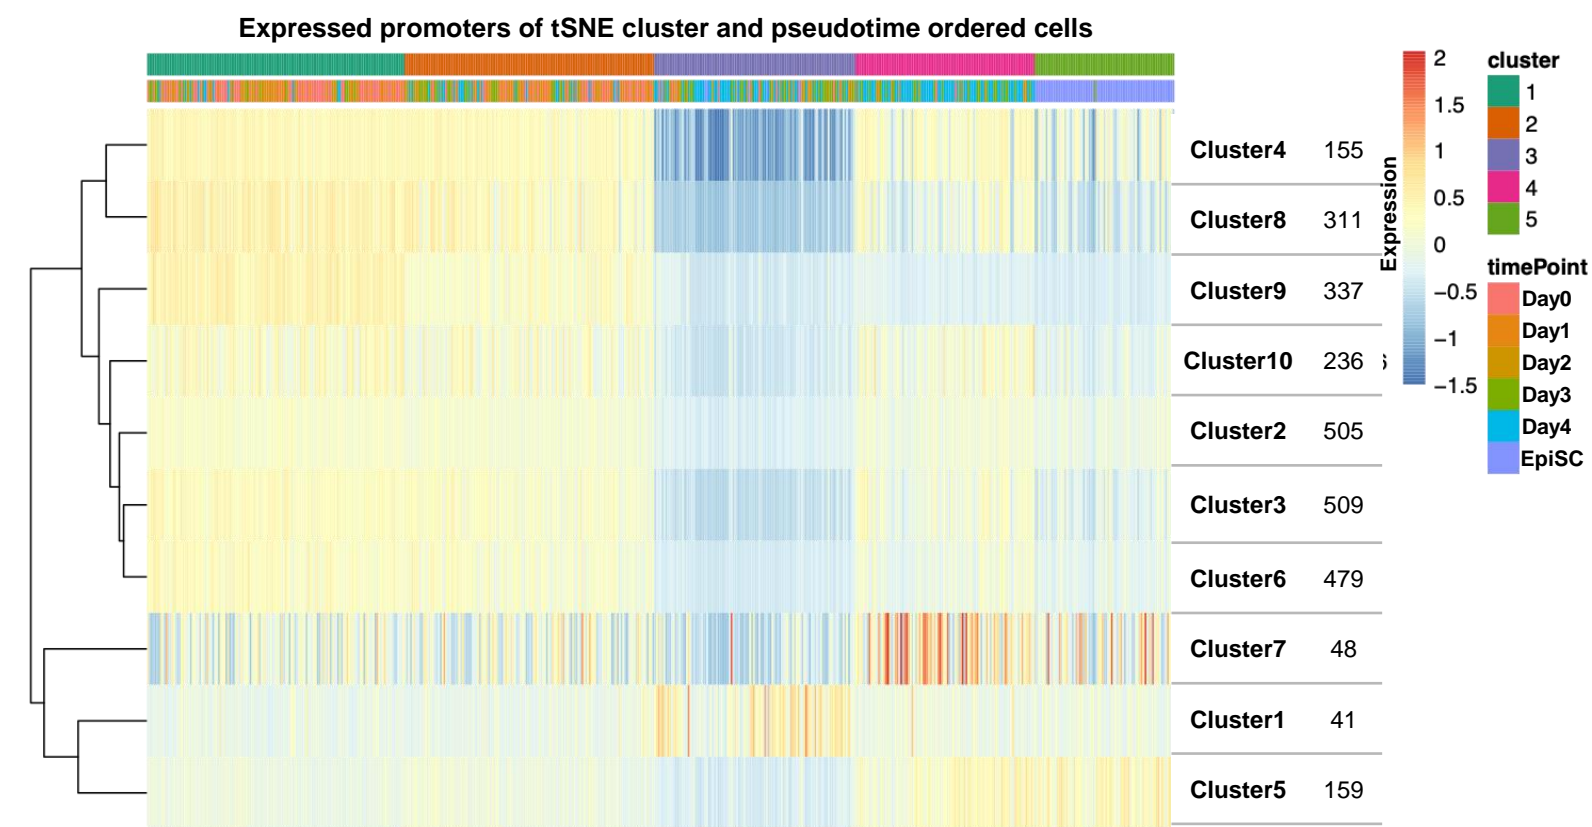

2780

**C**

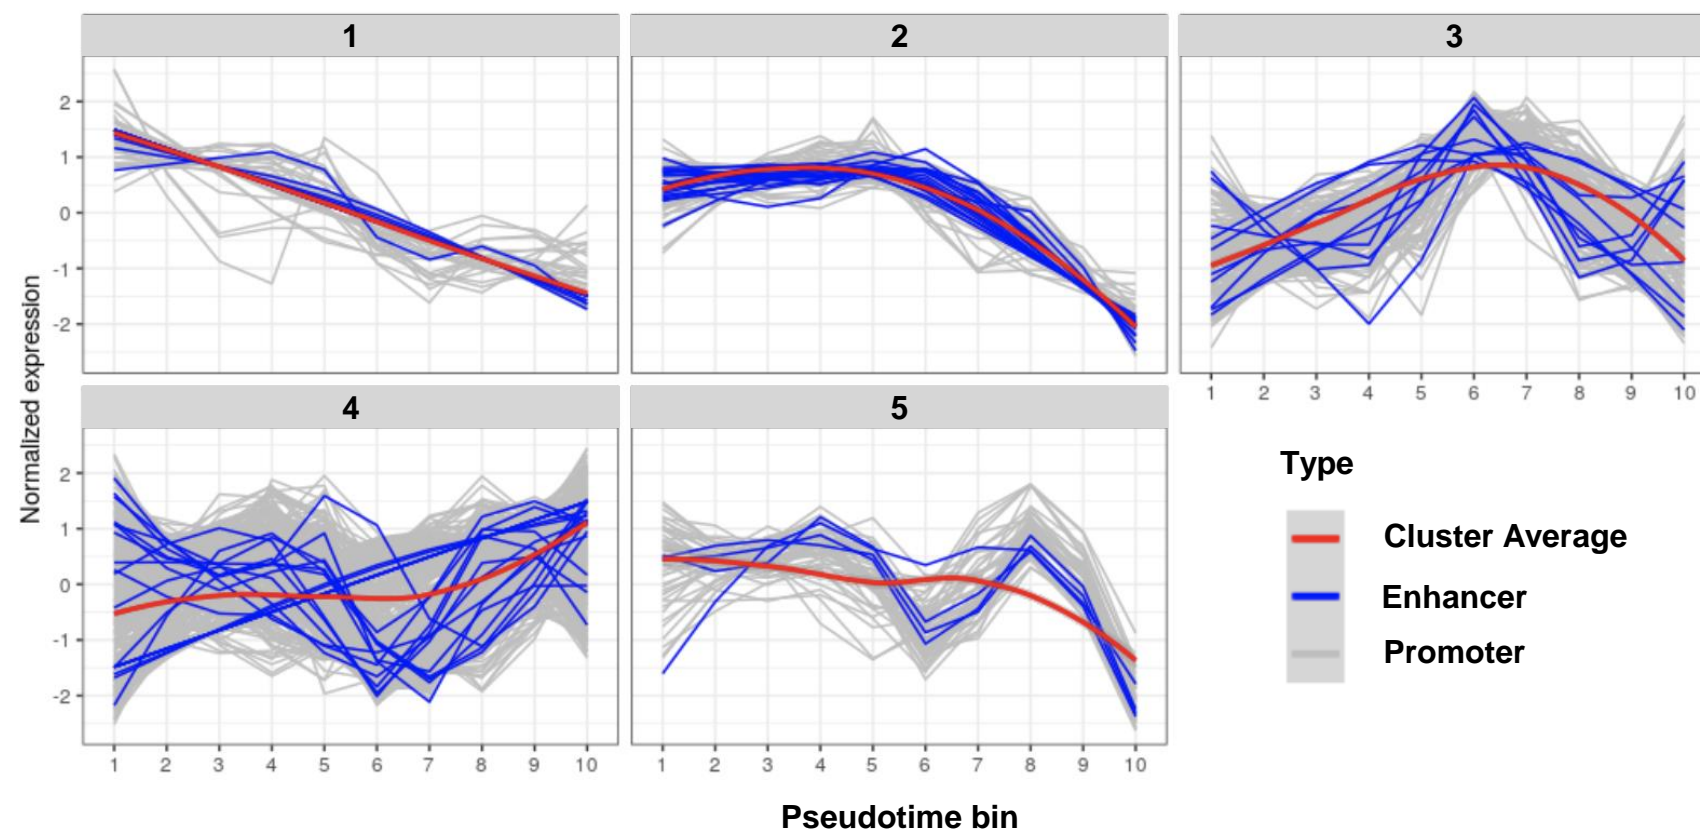

**Fig. 4**



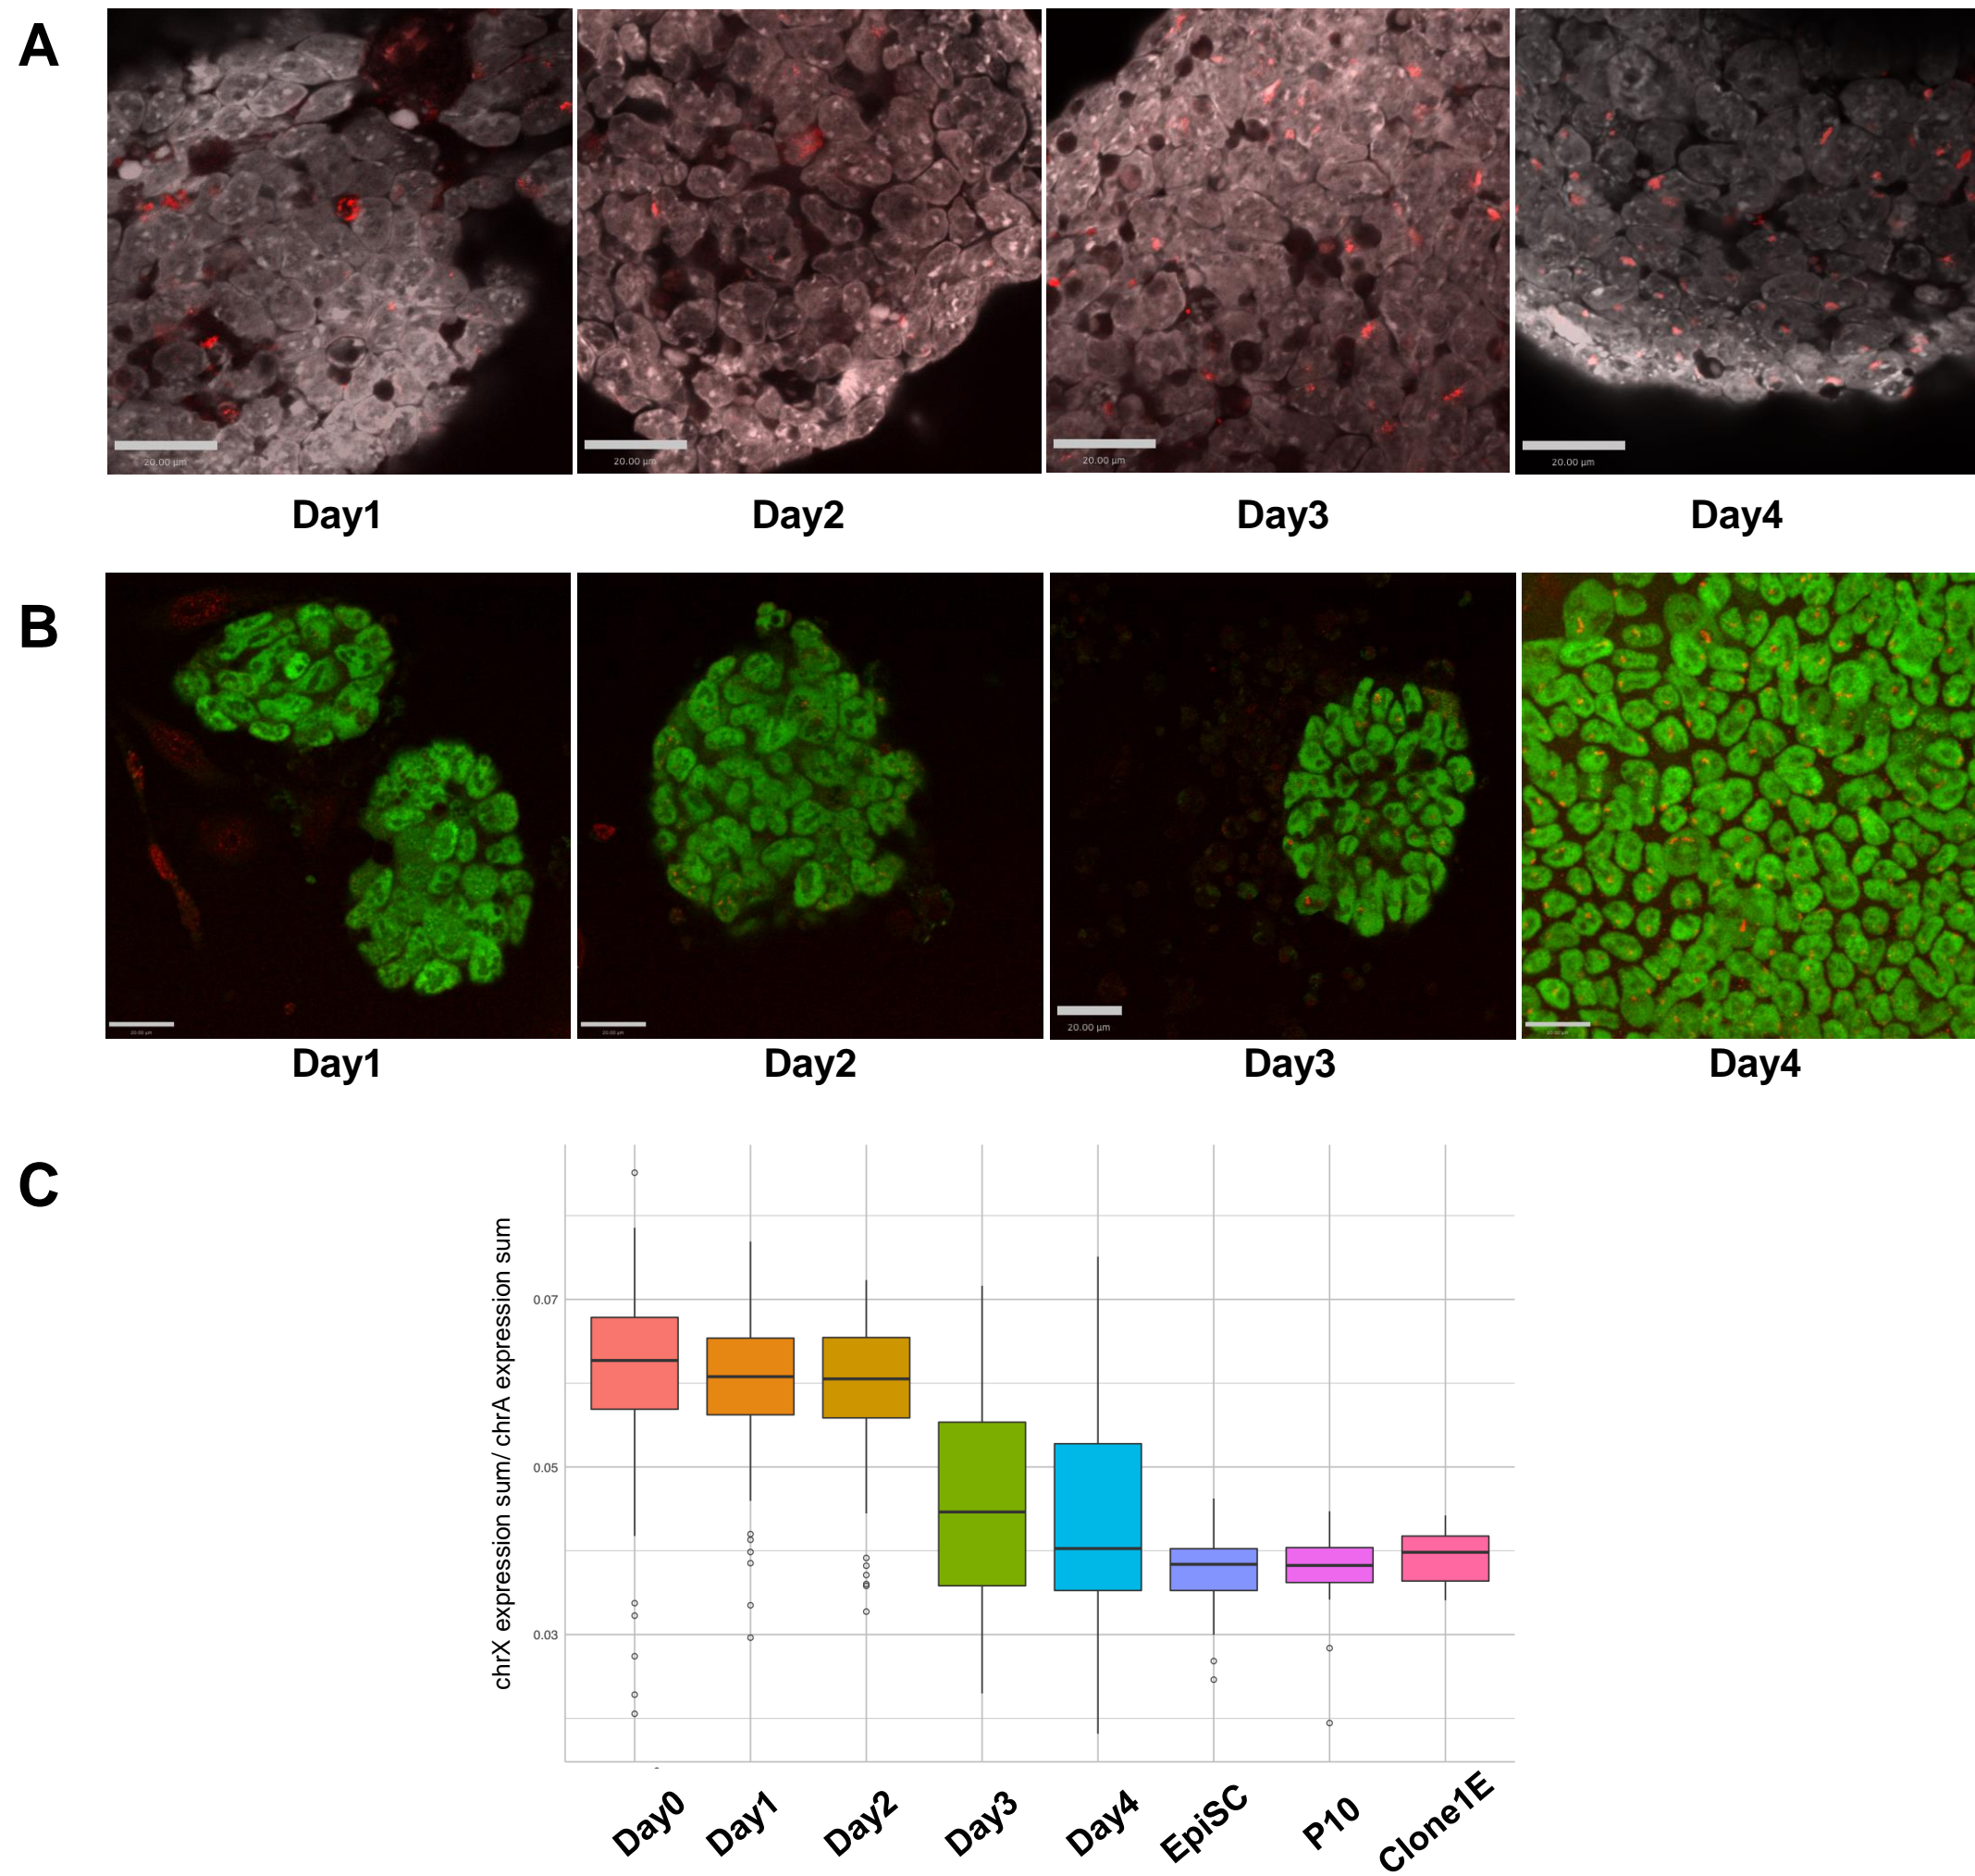

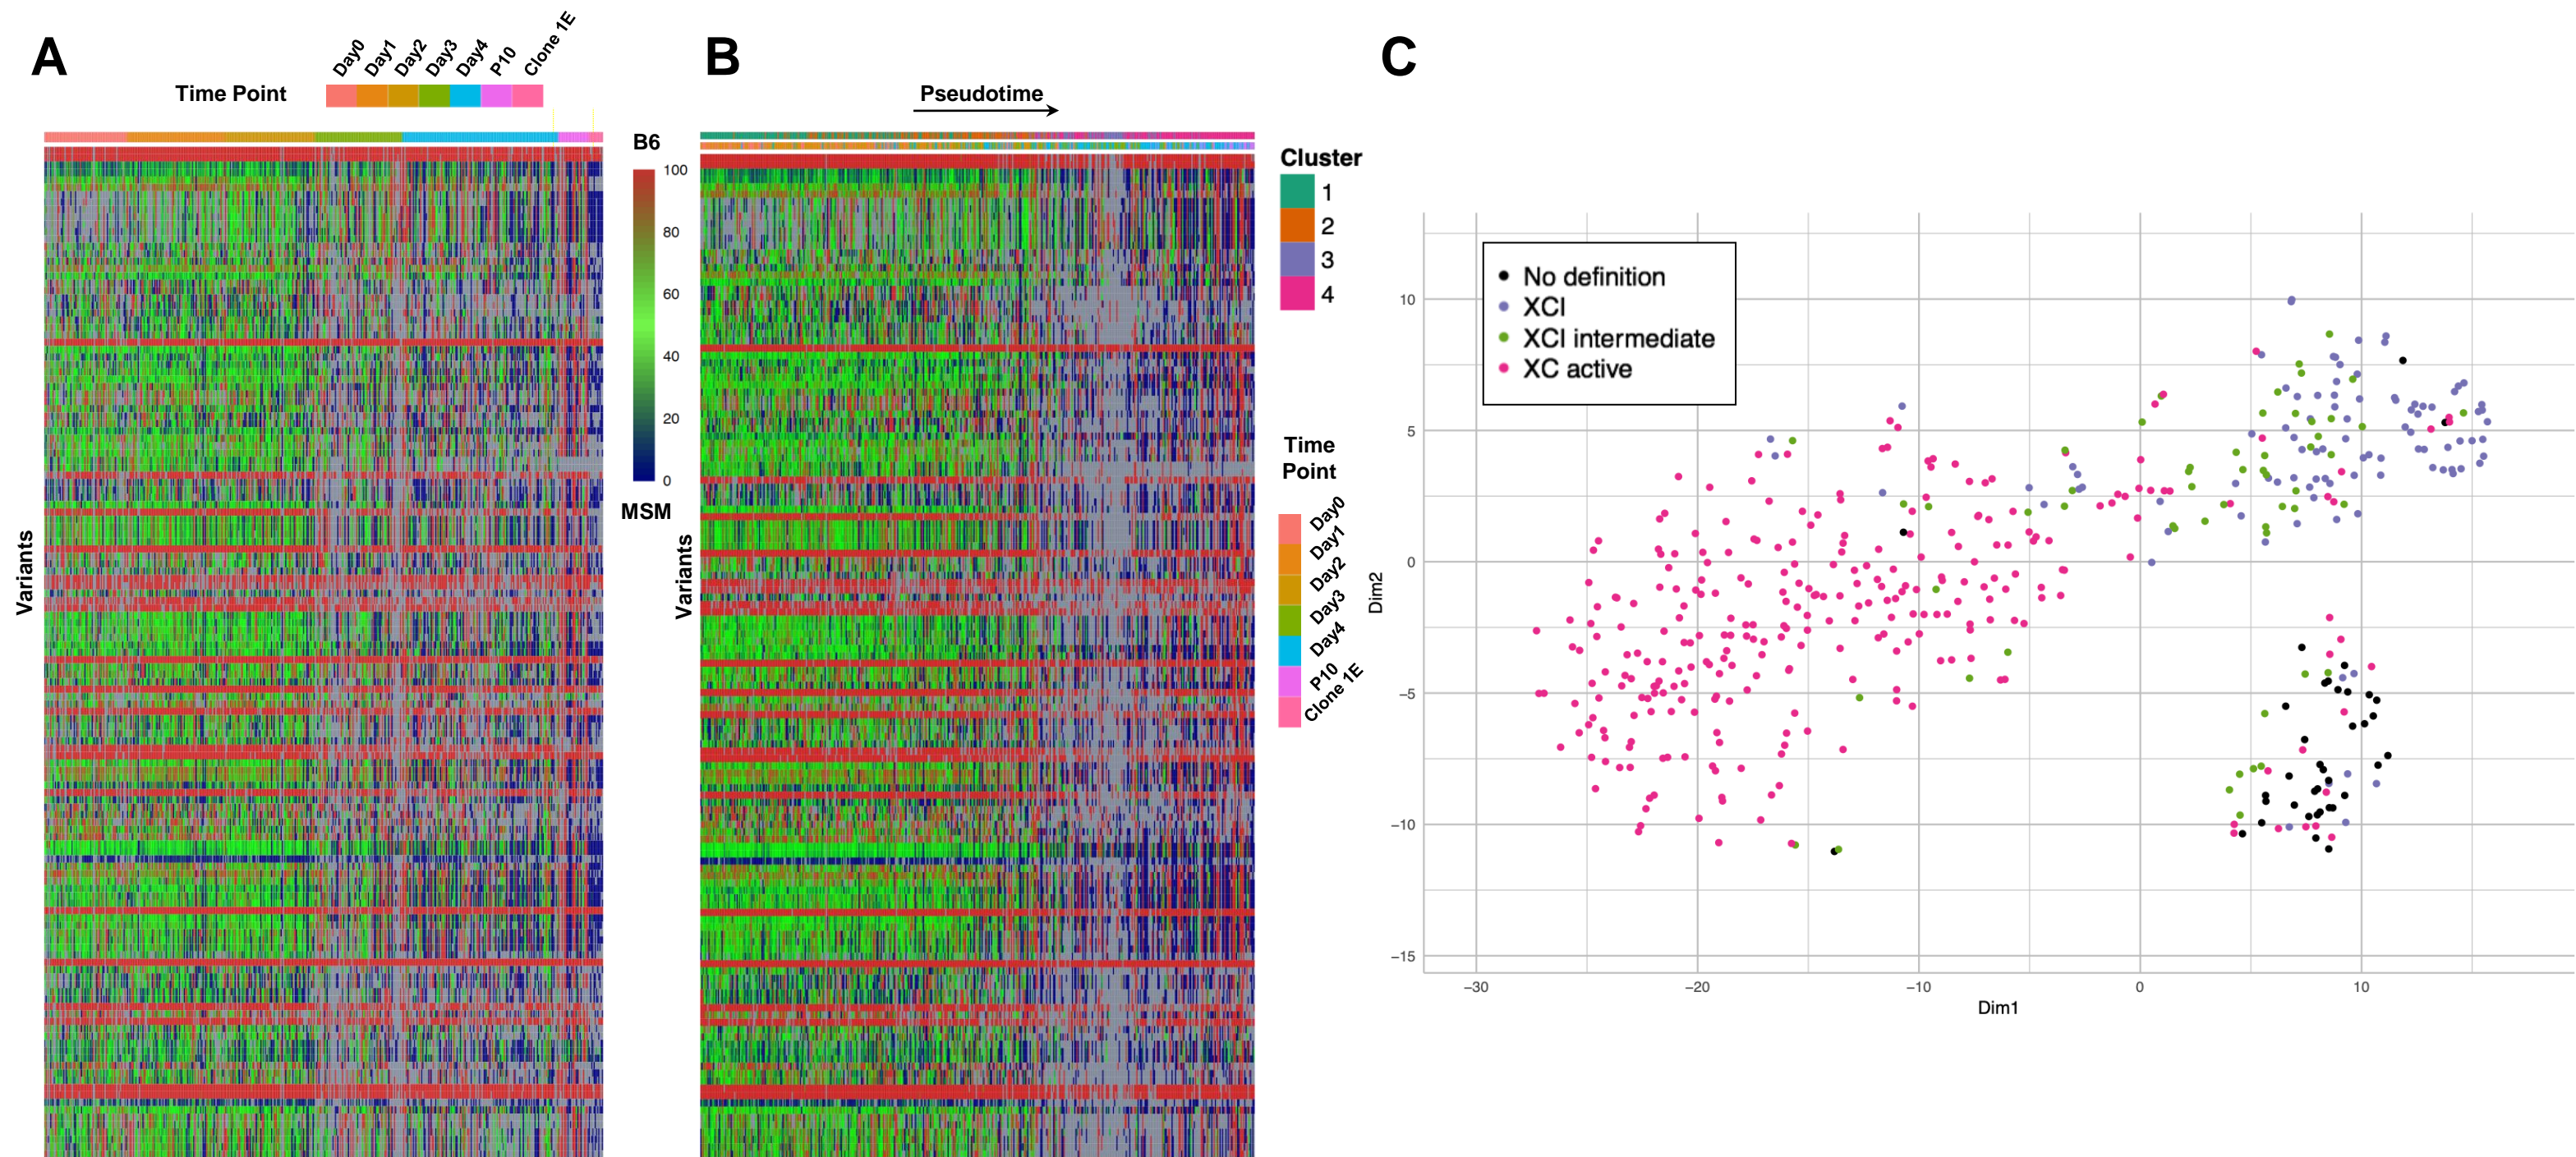

Fig. 6
